1 **Title:** Population genomics of Vibrionaceae isolated from an endangered oasis  
2 reveals local adaptation after an environmental perturbation.

3

4 **Authors:** Mirna Vazquez-Rosas-Landa<sup>1,2</sup>, Gabriel Yaxal Ponce-Soto<sup>1</sup>, Jonás A.  
5 Aguirre-Liguori<sup>1</sup>, Shalabh Thakur<sup>3</sup>, Enrique Scheinvar<sup>1</sup>, Josué Barrera-Redondo<sup>1</sup>,  
6 Enrique Ibarra-Laclette<sup>2</sup>, David S. Guttman<sup>3,4</sup>, Luis E. Eguiarte<sup>1</sup> and Valeria  
7 Souza<sup>1\*</sup>

8

9 **Addresses:** <sup>1</sup>Departamento de Ecología Evolutiva, Instituto de Ecología,  
10 Universidad Nacional Autónoma de México, Ciudad Universitaria, 04510, Ciudad  
11 de México, México.

12 <sup>2</sup>Red de Estudios Moleculares Avanzados, Instituto de Ecología, A.C. – INECOL,  
13 Clúster Científico y Tecnológico BioMimic<sup>®</sup>, Carretera antigua a Coatepec 351, El  
14 Haya, 91070 Xalapa, Veracruz, México.

15 <sup>3</sup>Department of Cell and Systems Biology, University of Toronto, Toronto, Ontario,  
16 Canada.

17 <sup>4</sup>Centre for the Analysis of Genome Evolution and Function, University of Toronto,  
18 Toronto, Ontario, Canada.

19

20 \* Correspondence: Valeria Souza, Instituto de Ecología, UNAM, [souza@unam.mx](mailto:souza@unam.mx),  
21 [souza.valeria2@gmail.com](mailto:souza.valeria2@gmail.com).

22

23

24

25

26

27 **Abstract (323 words).**

28 **Background:** In bacteria, pan-genomes are the result of the evolutionary "tug of  
29 war" between selection and horizontal gene transfer (HGT). High rates of HGT  
30 increase the genetic pool and the effective population size, resulting in open pan-  
31 genomes. In contrast, selective pressures can lead to local adaptation by purging  
32 the variation introduced by HGT, resulting in closed pan-genomes and clonal  
33 lineages. In this study, we explored both hypotheses elucidating the pan-genome  
34 of Vibrionaceae isolates after a perturbation event in the endangered oasis of  
35 Cuatro Ciénegas Basin (CCB), Mexico, and looking for signals of adaptation to the  
36 environments in their genomes.

37 **Results:** We obtained 42 genomes of Vibrionaceae distributed in six lineages, two  
38 of them did not showed any close reference strain in databases. Five of the  
39 lineages showed closed pan-genomes and were associated to either water or  
40 sediment environment; their high effective population size ( $N_e$ ) estimates suggest  
41 that these lineages are not from a recent origin. The only clade with an open pan-  
42 genome was found in both environments and was formed by ten genetic groups  
43 with low  $N_e$ , suggesting a recent origin. The recombination and mutation estimators  
44 ( $r/m$ ) ranged from 0.0052 to 2.7249, which are similar to oceanic Vibrionaceae  
45 estimations; however, we identified 367 gene families with signals of positive  
46 selection, most of them found in the core genome; suggesting that despite  
47 recombination, natural selection moves the Vibrionaceae CCB lineages to local  
48 adaptation purging the genomes and keeping closed pan-genome patterns.  
49 Moreover, we identify 598 SNPs associated with an unstructured environment;  
50 some of the genes under this SNPs were related to sodium transport.

51 **Conclusions:** Different lines of evidence suggest that the sampled Vibrionaceae,  
52 are part of the rare biosphere usually living under famine conditions. Two of these  
53 lineages were reported by the first time. Most Vibrionaceae lineages of CCB are  
54 adapted to their microhabitats rather than to the sampled environments. This  
55 pattern of adaptation agrees with the association of closed pan-genomes and local  
56 adaptation.

57

58 **Keywords:** (4 to 6)

59 Pan-genome, genomics, Vibrionaceae, recombination, selection, effective  
60 population size.

61

62

63

64

65

66

67

68

69

70

71

72

73

74

75

76

## 77 **Background**

78 Comparative genomics analyses have shown a wide range of genomic  
79 variation within bacteria from different phylogenetic groups [1-3]. This variation  
80 range has been explained in part by the wide ecological niche occupied by different  
81 bacterial groups [4-8]. Bacterial genomes, in contrast to eukaryotic genomes,  
82 usually maintain constant genome sizes [9, 10], suggesting that while horizontal  
83 gene transfer (HGT) increases the genome size by adding new genes, selection  
84 maintains the genome size by removing deleterious, non-functional or non-useful  
85 genes [11-13]. Therefore, bacteria can present very different genomic  
86 compositions even within a species, with HGT creating a flexible genome and  
87 natural selection purging or maintaining it [10, 14].

88 Thus, the type of pan-genome is an indication of the evolutionary “tug of  
89 war” between selection and HGT. As a prediction, if there are high rates of HGT,  
90 the total genetic pool will increase, as well as the effective population size,  
91 generating an open pan-genome maintained by natural selection [15]. However, if  
92 there is a selective pressure towards local adaptation, the genetic diversity  
93 introduced by HGT will be purged, resulting in a closed pan-genome and clonal  
94 lineages [14].

95 To start understanding the reasons why some pan-genomes are open while  
96 others are closed, we can analyze the rate and type of recombination. On the one  
97 hand, homologous recombination homogenizes populations, keeping them  
98 genetically cohesive in a closed pan-genome [16, 17]. On the other hand, non-  
99 homologous recombination brings new genetic material, offering new evolutionary  
100 opportunities for diversification and generating an open pan-genome [18-21].  
101 Recombination decreases linkage disequilibrium among genes, allowing selection  
102 and the related Hill-Robertson effect to operate in specific genes and avoiding the  
103 purged of genetic diversity along with the genome [22, 23]. As a result of this  
104 diversity, species with higher recombination levels maintain a large historical  
105 effective population size [15, 24, 25]. In contrast, highly clonal populations with low  
106 or no HGT evolve mostly by mutation and genetic drift, because the efficiency of

107 selection is hampered by the Hill-Robertson effect that also reduces the standing  
108 levels of variation in the population and the historical effective population sizes [23,  
109 26].

110 In this study, we explored the probable role of different evolutionary forces  
111 shaping the genetic diversity of Vibrionaceae in the oasis of the Cuatro Ciénegas  
112 Basin (CCB), Mexico. CCB is composed of several aquatic systems that have a  
113 significant unbalance of the nutrient stoichiometry [27]. Population genetic studies  
114 of *Pseudomonas* spp., *Exiguobacterium* spp. and *Bacillus* spp. isolated from CCB  
115 ponds and rivers in general have shown low recombination levels [28-30]. These  
116 patterns suggest that nutrient constraints in CCB may work as an ecological filter,  
117 reducing recombination maybe due to the cost of replicating new DNA, and leading  
118 to local adaptation [27, 31, 32].

119 We tested whether the environmental nutrient constraint would affect the  
120 genetic structure of *Vibrio* spp. lineages at CCB. Members of *Vibrio* spp. has been  
121 characterized in general as a highly recombinant [33, 34]. We analyzed the genetic  
122 structure of Vibrionaceae in a particular site of CCB, Pozas Rojas (Figure 1). This  
123 site was the most stoichiometrically unbalanced (N:P 156:1) in our first sampling on  
124 2008 [35]. Later, Pozas Rojas was naturally perturbed with intense rains  
125 associated with hurricane Alex in 2010. The runoff detritus and water, caused the  
126 nutrients ratios to change from extremely unbalanced stoichiometry to a ratio  
127 similar the standard values in the sea (N:P 20:1; compared to the Redfield  
128 standard N:P 16:1 values of the sea [36]). Given the change in stoichiometry ratios,  
129 we asked the following questions: 1) How did a naturally recombinant lineage like  
130 some members of Vibrionaceae respond to this perturbation? 2) Did Vibrionaceae  
131 lineages maintained their local adaptation to this unique site by restricting  
132 recombination, and maintaining their pan-genomes closed? Alternatively, 3) Is it  
133 possible that *Vibrio* spp. developed open pan-genomes with large effective  
134 population sizes, similar to the lineages in the ocean to deal with this stoichiometric  
135 change? [33, 34].

136           Herein we analyzed the role of the evolutionary forces that have shaped  
137 Vibrionaceae at CCB by performing a comparative genomics analysis of five  
138 reference and 42 strains isolated from two different local environments (i.e., water  
139 and sediments) in perturbed Pozas Rojas. Contrary to what we expected, our  
140 results show that most CCB Vibrionaceae lineages had similar levels of  
141 recombination compared to their oceanic relatives, and much higher levels of  
142 recombination than other genera in the CCB [28-30]. However, since most of the  
143 analyzed lineages had closed pan-genomes, we suggest that most of such  
144 recombination is homologous. This type of recombination should promote  
145 reproductive isolation and generate local adaptation. We did not observe a clear  
146 pattern of adaptation to either water or sediment environments, suggesting that  
147 there may be other environmental variables that we were not able to measure that  
148 could be driving local adaptation among these lineages.

## 149 **Results.**

150 **Nutrients concentrations.** Based on Kruskal-Wallis statistical test, the total  
151 nutrient concentrations (Carbon (C), Nitrogen (N), and Phosphorus (P)) of the  
152 Pozas Rojas were not significantly different between sample points,(C:  $p= 0.8815$ ;  
153 N:  $p= 0.2256$  and P:  $p= 0.9624$ ; Additional file 1: Table 1) however, they were  
154 statistically significant between type of environment (water vs. sediment) (C:  $p=$   
155  $3.486e-4$ ; N:  $p= 0.03798$  and P:  $p= 3.461e-4$ ).

156           The proportion of C:N:P was on average 350:9:1 for water, and 258:21:1 for  
157 sediment (Additional file 1: Table 2). This ratios indicate a stoichiometric “balance”  
158 (i.e., similar to Redfield standard ratios) in Pozas Rojas during 2013, due to higher  
159 P availability, compared with the extreme stoichiometric imbalance observed in  
160 most of CCB sites, and in particular in Pozas Rojas microbial mat during summer  
161 2008 (i.e., 15,820:157:1)[35], previous to the hurricane Alex perturbation.

162 **Phylogenetic Diversity and the environmental association.** The phylogenetic  
163 relationships of 16S rRNA gene (700 bases) of the 174 cultivated isolates from  
164 Pozas Rojas, showed that the strain collection was dominated by Vibrionaceae  
165 (63%), followed by Aeromonadaceae (14%) and Halomonadaceae (9.7%;

166 Additional file 1: Table 3). Among Vibrionaceae, we identified two different genera;  
167 most strains belong to *Vibrio* spp. (93.6%) and far less to the related  
168 *Photobacterium* spp. genus (6.3%).

169 The aligned sequences were used to construct a maximum likelihood tree  
170 with PhyML (Additional file 1: Figure 1). Based on the previous taxonomic  
171 assignment, the sequences of *V. alginolyticus*, *V. parahaemolyticus*, *V.*  
172 *anguillarum*, *V. metschnikovii*, and *Photobacterium* spp. were included as  
173 references. This analysis reveals seven different cultivated Vibrionaceae lineages  
174 in Pozas Rojas.

175 In order to characterize the relationship between water/sediment  
176 environments and Vibrionaceae lineages, we performed an AdaptML analysis [37].  
177 The analysis showed that strains are structured according to the environment  
178 where they were isolated, i.e., water or sediment, and not by pond (Additional file  
179 1: Figure 2). While most clades were specialist either to water (higher nutrient  
180 condition) or to sediment (lower nutrient condition), the most abundant lineage had  
181 no preference for any environment. Based on the AdaptML analysis, we selected  
182 42 isolates for further sequencing; these isolates were chosen as representatives  
183 from the different lineages and environments.

184 **Genome features.** Among the 39 CCB sequenced *Vibrio* spp. genomes, we found  
185 variation in terms of genome size, ranging from 3.1 Mbp to 5.1 Mbp, while the three  
186 CCB *Photobacterium* spp. genomes had an average genome size of 4.5 Mbp.  
187 Despite this variation, when we compared the CCB strains genomes to their  
188 closest reference strain, we found similar genome sizes (Additional file 1: Table 4).  
189 Moreover, for each of the assembled genomes, we evaluated their completeness  
190 with BUSCO [38]. We found that 92.8% of the genomes contained more than 95%  
191 of the 452 near-universal single-copy orthologs evaluated by the program  
192 (Additional file 1: Table 5), suggesting that the observed variation in genome sizes  
193 could be due to intrinsic characteristics of each strain and not to a sequencing bias.

194 **Pan-genome analyses of CCB Vibrionaceae and lineages description.** The  
195 pan-genome analysis of 39 CCB *Vibrio* spp., 3 CCB *Photobacterium* spp., and 5



196 *Vibrio* spp. references strains involved a total of 20,121 orthologous gene families.  
197 The genes that were present in at least 95% of the genomes conformed the core  
198 genome, including reference genomes, composed by 1,254 gene families. The  
199 accessory genome is far more substantial, consisting of a total of 14,072 genes  
200 families that were found in at least two of the obtained genomes. The rest 4,795  
201 genes families were strain-specific.

202 Using the core genes families, we reconstructed a lineage phylogeny  
203 (Figure 2). In the core phylogeny we found seven lineages, of which six of them  
204 were previously identified in the 16s rRNA gene tree, and one was represented by  
205 a unique strain of marine *V. furnissii* sp. Nov. 4 stran (NCTC 11218) [39].  
206 Reference strain *V. anguillarum* 775, isolated from a Coho salmon [40] clusters  
207 within the large generalist Clade II, while reference strain *V. metschnikovii* CP 69-  
208 14, which was isolated in marine systems, is basal to Clade III. Basal to Clade VI  
209 are reference *V. parahaemoliticus* BB22OP, a pre-pandemic strain [41] associated  
210 with seafood-borne gastroenteritis in humans and *V. alginolyticus* NBRC 15630 =  
211 ATCC 17749, an aquatic organism that can cause bacteremia. Clades IV and V  
212 are likely to be exclusive to CCB, given that there is no closely related strain  
213 sequenced on databases. Finally, Clade I is related to *Photobacterium* spp. (Figure  
214 2).

215 From the six clades identified, only Clade II presented an open pan-genome  
216 as suggested by the Heaps law analysis [42] ( $\alpha=0.7913$ ). The rest of the  
217 clades displayed closed pan-genome patterns (i.e.,  $\alpha$  values  $>1.0$ ; Table 1).  
218 We performed random sub-samplings of genomes per clade to verify the effect of  
219 sample size and we re-calculate  $\alpha$  values of each clade with the minimum  
220 sample size, and in all cases, we found the same results of closed pan-genomes  
221 for the specialist clades and an open pan-genome for generalist clade (Additional  
222 file 1: Figure 3).

223 **Genetic diversity and recombination estimates.** General estimators of genetic  
224 diversity were obtained for each clade and Sub-clade (Table 2). We found that  
225 nucleotide diversity values for Clades III, IV, and V were the lowest within sample,



226 ranging from 2.86E-05 to 0.0051, while Clades I, II, and VI had higher levels of  
227 genetic variation, in the range of 0.011 to 0.046. When estimating the nucleotide  
228 diversity for Sub-clades belonging to Clade II (described below, see Additional file  
229 1: Figure 4), we found lower values in the range of 1.61E-06 to 5.47E-06. This  
230 same pattern was observed for the  $\theta_w$  values (Table 2). Due to the number of  
231 individuals we could not obtain Tajima's  $D$  estimator for Clades I and VI. For the  
232 rest of the clades Tajima's  $D$  values were negative, except for Clade II that had  
233 positive values.

234         Since most lineages present a closed pan-genome, we tracked the  
235 footprints of recombination by using two different approaches. The first approach  
236 consisted of assessing the recombination in each ortholog group. The second  
237 involved the identification of recombination signals based on a whole genome  
238 alignment. With the first approach, we found that from the 15,380 ortholog clusters  
239 analyzed, only the 11% (1,759) showed significant signal of recombination  
240 (Additional file 2: Table 6). These recombination events occurred more frequently  
241 among isolates of the same environment and pond, suggesting reproductive  
242 isolation associated to an environmental variable (Figure 3). However and despite  
243 we considered in our calculations the pan-genome size, number of strains per  
244 clade and branch length, it is also true that most clades are conformed by only  
245 isolates of water or sediment. Therefore, we propose that the frequency of  
246 recombination events is mostly restricted to occur within clades (Figure 3;  
247 Additional file 1: Figure 5).

248         In the case of the generalist Clade II, we found sub-structure. Using Nei's  
249 genetic distances, we identified ten genetic groups (that we will call Sub-clades  
250 therefore) with distances greater than 0.001. The discriminant function shows the  
251 same structure as the Nei distances, reflecting a broader relationship between  
252 Sub-clades A, D, F and G and B with C and E. Meanwhile, H, I and J Sub-clades  
253 had dissimilar sub-structures (Additional file 1: Figure 4). Since only three of the  
254 Sub-clades contained more than two isolates, further analyses were just performed  
255 with the larger Sub-clades (A, D and G).

256           Following the second approach, we evaluated the impact of homologous  
257 recombination and mutation within lineages estimating  $r/m$  using the clonal frame  
258 software [43]. This measure reflects the ratio of probabilities that a given  
259 polymorphism is explained by either recombination ( $r$ ) or by mutation ( $m$ ). Clade VI  
260 displayed the lowest  $r/m$  values=0.0052, while Clade I (i.e., *Photobacterium* spp.)  
261 had the highest value in our dataset,  $r/m = 2.72$  (Table 3). We also performed the  
262 same analysis on *V. parahaemolyticus*, *V. ordalii*, *V. anguillarum*, and *P. leiognathi*  
263 reference genomes, all isolated from marine environments. For the marine  
264 samples,  $r/m$  estimates were within the range of CCB strains, except *V.*  
265 *anguillarum*, which had the highest values (Table 3). This analysis also shows that  
266 some recombination events are shared with *Vibrio* spp. references strains  
267 (Additional file 1: Figure 6) supporting the hypothesis of ancient origin of these  
268 recombination events even though more recent recombination events were  
269 detected only among CCB strains. This indicates that homologous recombination is  
270 a constant source (albeit relatively infrequent) of polymorphism in the analyzed  
271 strains.

## 272 **Estimates of effective population sizes.**

273 Using a simulation approach with the Fastsimcoal2 program [44] we estimated the  
274 posterior distribution of the effective population size ( $N_e$ ) of each of the six clades.  
275 We found large population sizes (Table 4) ranging from millions in the specialist  
276 Clades I ( $N_e = 12,822,270$ ), III ( $N_e = 15,018,880$ ), V ( $N_e = 9,594,874$ ) to  
277 intermediate in the range of thousands in the Clades IV ( $N_e = 383,067$ ) and VI ( $N_e$   
278  $=141,870$ ), and to far smaller in the Sub-clades of the locality common generalist  
279 Clade II ( i.e., Sub-clade A  $N_e = 55,938$ ; Sub-clade D  $N_e = 20,849$ ; Sub-clade G  
280  $N_e = 29,791$ ) reinforcing the idea of recent diversification in these Sub-clades.

## 281 **Selection analyses**

282           FUBAR uses a codon-based model of evolution that allows the identification  
283 of evolving sites under positive or purifying selection in protein-coding genes  
284 through a Markov chain Monte Carlo (MCMC) routine. From a total of 15,380  
285 ortholog clusters analyzed, only 367 (2.3 %) had a significant signal of positive

286 selection according to FUBAR results. Of these ortholog gene families, 297  
287 belonged to the flexible genome, while 70 are part of the core genome. However,  
288 when we considered the universe of ortholog genes that conform the flexible  
289 genome (14,072), only 2.1% of the flexible genome had signals of positive  
290 selection, while in the core genome, composed by 1,254 genes, 5.6% of the genes  
291 are positive selected (Additional file 2: Table 7). A GO enriched analysis was  
292 performed in order to identify those biological functions overrepresented given  
293 those ortholog clusters with positive selection. Seven Gene Ontology (GO) terms  
294 were enriched within these families. (Table 5). Moreover, based on a whole  
295 genome alignment, we obtained 38,533 SNPs variants, from which 26,663 were bi-  
296 allelic characters that were used in an UPGMA analysis of genetic distances. This  
297 analysis produced the same clustering as the core genome phylogeny (Figure 2).  
298 As well, with this SNPs we performed a membership probability test, which show  
299 that all the isolated had the same probability of been isolated from any pond and  
300 environment (Additional file 1: Figure 7).

301 We found on average 2,473 private (unique) SNPs for each one of the nine  
302 ponds, 33,655 private SNPs for water or sediment environments, and 29,141,  
303 private SNPs for each of the six clades. This abundance of private SNPs suggests  
304 an effect of the environment, either by local adaptation (selection) or by genetic  
305 drift (low effective sizes or little or no gene flow).

306 We removed the SNPs with a minor allele frequency  $< 0.05$  (771 SNPs  
307 removed) and we kept the alleles that were found in at least three individuals, for a  
308 total of 25,892 SNPs. Within those SNPs we detected a total of 598 SNPs with an  
309 association to the sediment environment. A UPGMA analysis of these 598 SNPs  
310 was performed in order to infer the similarity between samples (Figure 4) finding  
311 most of the clusters previously observed with the core genome phylogeny (Figure  
312 2), except Clade III, which appears inside Clade II. Moreover, the mixed isolates of  
313 Clade III fall among the Sub-clade G of Clade II, most of them were isolated from  
314 water environment, as well as members of Clade III (Figure 4), suggesting a  
315 preference for diluted, unstructured environments.

316 To analyze the distribution of the SNPs, we mapped the above detected 598  
317 SNPs to their positions in the genome alignment from where they were obtained,  
318 moving in 1 Kb windows. A total of 144 genomic regions containing SNPs were  
319 inspected, and we found 237 ortholog gene families in these regions. From these  
320 ortholog gene families, only 24 showed recombination signals, while 18 had  
321 selection signals (Additional file 2: Table 8). Within those SNPs we performed a  
322 test for GO-term enrichment with TopGO [45]. From the 24 ortholog genes families  
323 with recombination signals, we detected four enriched GO, while we found only  
324 one enriched GO-term in the 18 ortholog gene families with selection signals  
325 (Table 6).

326 Besides those analyses, based on pan-genome information, we looked for  
327 specific coding sequences that could be private (unique) to a specific pond,  
328 environment, or clade. There were no specific genes associated with a particular  
329 environment or pond, but we did identify ortholog gene clusters exclusive per  
330 clade. From Clades I to VI, we observed 1280, 10, 72, 23, 72, and no exclusive  
331 ortholog gene families, respectively. For each clade with exclusive ortholog gene  
332 families, we looked for enriched GO terms. On Clade I the term related with  
333 bacteriocin immunity was enriched; Clade II were enriched with terms associated  
334 to siderophore transport; in Clade III the category related to the biosynthesis of  
335 lipopolysaccharides was enriched; and on Clades IV and V there were enriched  
336 terms related to tRNA biosynthesis (Additional file 1: Table 9).

## 337 **Discussion**

338 In this study we performed comparative genomic analyses to understand  
339 how evolutionary forces shaped the pan-genome of 42 Vibrionaceae strains  
340 isolated from CCB, where environmental filtering is believed to increase local  
341 adaptation due to extreme stoichiometric bias [27]. In our study we described how  
342 a natural perturbation lead to a temporal balanced stoichiometry, allowing six  
343 lineages of Vibrionaceae to prosper under a “feast-famine” cycle. Most of these  
344 lineages present large population sizes as well as recombination rates comparable  
345 to their oceanic counterparts. However, their pan-genomes remained closed

346 probably due to selection purging HGT events external to each clade where  
347 genetic isolation has maintained clade specific selective events. Clade II is the  
348 exception, this large clade shows an open pan-genome with evidence of  
349 substructure with small effective sizes suggesting early stages of diversification.

350 **Ecology and microbial diversity in CCB.** During the past 20 years, one of the  
351 main questions surrounding CCB bacterial hyper-diversity has been related to the  
352 roles of ecology and evolution promoting and maintaining its remarkable microbial  
353 diversity [27, 46]. According to Souza *et al.* “lost world” hypothesis, the extreme  
354 unbalanced stoichiometry (i.e., very low P availability) of CCB not only keeps the  
355 “ancestral niche” of many bacterial lineages, but also works as a semipermeable  
356 barrier to migration, restricting migration and keeping these ancient bacterial  
357 lineages alive and thriving in CCB [27]. As a result of these ecological and  
358 evolutionary conditions, CCB lineages are generally clonal [28-30] displaying an  
359 ancient marine ancestry [27, 32, 47]. Paradoxically, this extremely unbalanced  
360 stoichiometry seems to be in part the reason behind CCB high microbial  
361 endemism and local differentiation: “No food, no sex, no travel” [27, 31, 32],  
362 allowing for local adaptation and broad differentiation between sites.

363 In this study we explored the evolutionary dynamics after a natural  
364 perturbation (in this case a flood) changed the ecological condition in CCB in a  
365 particular site (Pozas Rojas), generating a temporarily more “balanced”  
366 stoichiometric proportions (i.e., N:P 20:1). We know by meteorological data that  
367 similar floods occur at CCB sporadically, due to the low incidence of intense storms  
368 (i.e., three since 1940 [48]). The flood moved to this low land a large amount of  
369 debris that with time, generated an increase in nutrients, in particular phosphorus  
370 that opened opportunities for the “rare biosphere”, represented by standing  
371 bacterial lineages usually found at very low proportions, like the rare members of  
372 Vibrionaceae that normally are not common at standard low nutrient conditions [49-  
373 51]. Given this change in resources, we proposed two hypotheses when we started  
374 this study: Vibrionaceae from CCB would show as their ocean counterparts, an  
375 open pan-genome, showing high levels of recombination and genetic variation, as

376 well as a high  $N_e$ . Alternatively, due to local adaptation in each lineage of CCB,  
377 Vibrionaceae would display closed pan-genomes, and a strong genetic structure,  
378 generated by high clonality and low genetic variation probably related to periodic  
379 selection and small effective population sizes among lower levels of genetic  
380 variation.

381 **Vibrionaceae in CCB.** In a previous study at Pozas Rojas using both cultivated  
382 strains and metagenomic data, Bonilla-Rosso *et al.* found that *Vibrio* spp. was  
383 either very rare or absent [49]. In their study, the authors found mostly  
384 Pseudomonads among the cultivated strains [49]. This result was confirmed with  
385 metagenomics, where Pseudomonadales, Burkholderiales, and Bacillales  
386 represented 50% of the metagenome reads. As a result of this previous  
387 knowledge, in the 2013 sampling, we first used PIA media to analyze the effect of  
388 the 2010 flood in the previously abundant genera, however, we found that this  
389 lineage was replaced in the cultures by *Vibrio* spp. In other words, the increased  
390 levels of nutrients and the perturbation reduced the abundances of *Pseudomonas*  
391 and related genera in CCB. This effect was corroborated later in another system in  
392 CCB (Churince) with a nutrient enrichment experiment [50, 52]. Among the  
393 analyzed genomes, we found two clades of Vibrionaceae, Clades III and IV, that  
394 had not been isolated previously and could be endemic to the basin.

395 **Recombination, pan-genomes, and selection in Vibrionaceae.** Diversity  
396 measures,  $\pi$  and  $\theta_w$  showed lower diversity than cosmopolitan *E. coli* [53],  
397 nevertheless, for Clades I, II and VI, those values are comparable to the ones  
398 observed in pathogenic *Vibrio* spp. [54, 55] suggesting similar demographic  
399 dynamics. Tajima's D was in most cases negative, except for Clade II, but none of  
400 the values were statistically significant. This could suggest bottlenecks in the  
401 process of diversification explaining the extremely low effective population size and  
402 diversity in those Sub-clades. Negative values of Tajima's D suggest high content  
403 of rare alleles, which is in agreement with the private allele test we performed [56].  
404 In the same way, it could be the result of selective sweeps or recent demographic  
405 expansion as a result of the new nutrient conditions (feast).



406 This study corroborates the importance of recombination in Vibrionaceae,  
407 supporting the recombinant nature of the genomes in the family [33, 34]. Elevated  
408 recombination rates are maintained in all the lineages from Pozas Rojas,  
409 supporting our first hypothesis that *Vibrio* spp. from CCB would have similar  
410 evolutionary process and genetic structure than marine lineages. Further scrutiny  
411 revealed an unexpected result: even if recombination rate is similar to their oceanic  
412 counterparts, homologous recombination and selection apparently maintain the  
413 adaptation to the local environment. Even in Clade II, recombination is more  
414 abundant among related strains, suggesting that this clade is in an actively  
415 diversifying process, allowing their different Sub-clades to adapt to different  
416 environments within CCB, as it is the case of aquatic Sub-clade G that shares  
417 similar SNPs under selection than aquatic Clade III.

418 We believe that the natural disturbance at Pozas Rojas generated by an  
419 increase in nutrient availability relaxed selection against HGT. Nevertheless  
420 recombination is kept within close lineages resulting in large effective population  
421 sizes and a closed pan-genome in most of the lineages, allowing selection to act in  
422 response to environmental pressures [57-59]. The closed pan-genome of these  
423 lineages contrast to what has been reported in oceanic *Vibrio* spp. where  
424 populations sizes are large and pan-genomes are kept open due to HGT [60].  
425 Even though Clade II is the only one with an open pan-genome, its internal  
426 substructure suggest a recent process of diversification where each of its Sub-  
427 clades show again a closed pan-genome, with smaller  $N_e$  and low genetic diversity.

428 **Selection and adaptation in Pozas Rojas.** We found 367 gene families that have  
429 signals of positive selection, most of them regarding the whole group of ortholog  
430 genes found in the core genome (2.05% of the flexible genome and 5% of the core  
431 genome; Additional file 2: Table 9). This result suggests that selection purges the  
432 genes that are in the flexible genome, closing the pan-genomes. Among the  
433 detected genes with selection signals, seven functional GO terms were enriched,  
434 one of them was the term GO:0007156, which is associated with cell-cell adhesion;  
435 within this category, most of the genes annotated were related to cadherin domains



436 that have been associated to biofilm formation [61]. In natural environments, biofilm  
437 formation allows bacteria to cope with environmental changes, protects the cell,  
438 provides mechanical stability, and provides cellular adhesion with other cells or  
439 with surfaces. It has been observed that biofilm formation is a persistent  
440 characteristic among bacteria from CCB in both water and sediment, and also  
441 under different nutrient conditions [52].

442         When we performed a genome-wide association study (GWAS) test to  
443 analyze the association of the SNPs to either water or sediment environment, we  
444 identified 598 SNPs related to sediment. The UPGMA analysis showed a similar  
445 clustering pattern as the core genome (Figure 4), suggesting a clade effect.  
446 However, Cluster III grouped among the Sub-clade G of Clade II, and most of the  
447 isolates of this Sub-clade as well as Clade III were isolated from the water  
448 environment. One possibility is that these SNPs are important to the adaptation to  
449 non-structured environments such as water. Some of the genes associated to  
450 these SNPs presented signals of recombination and selection. One of the  
451 functional enrichment GO terms within these genes was the GO:0006814, which is  
452 involved in sodium transport; some of the genes annotated within this category  
453 were the bacterial Na<sup>+</sup>/H<sup>+</sup> antiporter B (NhaB) that has been suggested to play a  
454 role in the adaptation of halophilic and haloalkaliphilic proteobacteria to marine  
455 habitats [62]. This gene has also been found to play a role in homeostasis in *Vibrio*  
456 spp. [63]. Our data suggest that there is a selective pressure over some clades  
457 regarding the water environment.

458         When we analyzed unique genes for each clade disregarding the isolation  
459 environment, in the case of Clade I we found the term GO:0030153 enriched,  
460 which is related to bacteriocin immunity. However, antibiotic resistance associated  
461 genes did not show particular signals of selection, suggesting that overall there is  
462 no ongoing selective pressure for defense. In the large generalist Clade II, we  
463 found three GO terms enriched, two of them related to cell wall structure while the  
464 third is related to siderophore transport, a group of genes that were rare in the  
465 previous metagenomic analysis of the same site [35]. In the case of Clade III, the

466 enriched GO term is related to lipopolysaccharide biosynthesis. Meanwhile, in  
467 Clade IV, we identified six enriched GO terms, where most of them were related to  
468 transport and signal transduction. Finally, for Clade V, we identified four terms  
469 enriched mostly related to transport. These results suggest that distinct clades are  
470 indeed responding to their environment in different ways reinforcing the idea of  
471 genetic isolation as a way to preserve local adaptation (Additional file 2: Table 8).

472 **Perspectives and conclusions.** At CCB, most of the environments present an  
473 extremely low phosphorus concentration, a factor that acts as an effective  
474 migration barrier maintaining conditions of the ancient sea as well as ancestral  
475 microbial diversity [27]. However, due to natural perturbation, we had the  
476 opportunity to observe in Pozas Rojas what happens when that nutrimental barrier  
477 is lifted temporarily. Apparently, rare biosphere strains that normally had a hard  
478 time surviving low P conditions can follow a feast-famine cycles and have  
479 population expansion when the P availability is less limiting.

480 In order to understand the other dimensions of local adaptation, further  
481 sampling of *Vibrio* spp. in CCB is needed. Unfortunately, this extraordinary oasis is  
482 disappearing, given the loss of more than 95% of CCB wetlands due to  
483 groundwater overexploitation by agriculture [27, 47,51, 64].

#### 484 **Methods.**

485 **Site description.** We analyzed bacterial isolates from sediment and water of nine  
486 ponds in the Pozas Rojas area of CCB (Figure 1). This site is composed of several  
487 small ponds (locally called *pozas*) that surround a larger pond in the system of Los  
488 Hundidos [30, 35]. These small ponds become hypersaline in summer [30], and  
489 used to have the highest stoichiometric unbalance (i.e., lowest P concentration)  
490 reported in CCB (C:N:P 15820:157:1)[35]. The ponds have seasonal high  
491 fluctuations in temperature (around 1 °C in winter to up to 60 °C in some summer  
492 moments in some cases)[35] and are small but permanent, separated from each  
493 other by ca. 9 meters or more, along an arch around the larger pond. However, the  
494 Pozas Rojas were flooded by hurricane Alex during summer 2010, merging most of  
495 the small ponds into a single large pond, until autumn 2011, when the water

496 receded, leaving the moon shaped array of small red ponds at the same place  
497 (Figure 1).

498 **Sample collection and strains isolation.** We collected water and sediment  
499 samples in duplicate from nine ponds located in Pozas Rojas, Los Hundidos, CCB,  
500 during March 2013 and stored them at 4 °C until processing. Sediment was  
501 collected for nutrient analysis in 50 ml Falcon tubes and covered with aluminum foil  
502 before storage. Water was collected for nutrient quantification in 1 liter volumes  
503 and stored in the dark at 4 °C. Chemical analyses were performed at the Instituto  
504 de Investigaciones en Ecosistemas y Sustentabilidad, UNAM, in Morelia, Mexico.  
505 Cultivable strains from both sediment and water were isolated in PIA  
506 (*Pseudomonas* isolation agar) and TCBS (Thiosulfate Citrate Bile Sucrose Agar)  
507 as previously described [52, 65], obtaining a total of 174 isolates, being 88 isolates  
508 from sediment and 86 from water.

509 **Environmental variables measurement.** For nutrient quantification, sediment  
510 samples were dried, and water samples were filtered through a Millipore 0.42 µm  
511 filter. Total carbon (TC) and inorganic carbon (IC) were determined by combustion  
512 and colorimetric detection [66] using a total carbon analyzer (UIC model CM5012,  
513 Chicago, USA). Total organic carbon (TOC) was calculated as the difference  
514 between TC and IC. For total N (TN) and total P (TP) determination, samples were  
515 acid digested with H<sub>2</sub>SO<sub>4</sub>, H<sub>2</sub>O<sub>2</sub>, K<sub>2</sub>SO<sub>4</sub> and CuSO<sub>4</sub> at 360°C. Soil N was  
516 determined by the macro-Kjeldahl method [67], while P was determined by the  
517 molybdate colorimetric method following ascorbic acid reduction [68]. The N and P  
518 forms analyzed were determined colorimetrically in a Bran-Luebbe Auto analyzer 3  
519 (Norderstedt, Germany).

520 **DNA Extraction and PCR Amplification of 16S rRNA.** For the 174 isolates  
521 obtained, DNA extraction was performed as described by Aljanabi and Martinez  
522 (1997) [69]. 16S rRNA genes were amplified using universal primers 27F (5'-AGA  
523 GTT TGA TCC TGG CTC AG-3') and 1492R (5'-GGT TAC CTT GTT ACG ACT T-  
524 3') [70]. All reactions were carried out in an Applied Biosystems Veriti 96 Well  
525 Thermal cycler (California, USA) using an Amplificasa DNA polymerase

526 (BioTecMol, Mexico) with the following program: 94°C for 5 min, followed by 30  
527 cycles consisting of 94°C for 1 min, 50°C for 30 s, 72°C for 1 min and 72°C for 5  
528 min. Polymerase chain reaction (PCR) amplification products were  
529 electrophoresed on 1% agarose gels. Sanger sequencing was performed at the  
530 University of Washington High-Throughput Genomics Center.

531 **Phylogenetic analysis of 16S rRNA sequences.** The first 700 bps of the 16S  
532 rRNA gene, were aligned with Clustalw [71] and quality control was performed with  
533 Mothur [72]. Genera level identification was made using the classifier tool [73] from  
534 the Ribosomal Database Project (RDP) Release 11.4 [74] (Additional file 1: Table  
535 3). Blastn searches were performed against Refseq database from NCBI to select  
536 reference sequences. A total of 101 sequences were identified as members of the  
537 Vibrionaceae family, 41 were isolates from water and 60 from sediment. These  
538 isolates were used in subsequent analyses. A maximum likelihood phylogenetic  
539 reconstruction was obtained with PhyML version 3.0 [75], using the HKY+I+G  
540 substitution model estimated with jModelTest 2 [76]. The degree of support for the  
541 branches was determined with 1,000 bootstrap iterations.

542 **Environmental association of phylogroups.** To test whether the community of  
543 cultivable strains was structured based on its isolation environment (i.e., water or  
544 sediment), we performed an AdaptML analysis [37], including our 101 isolates  
545 belonging to Vibrionaceae and an *Halomonas* spp. strain as an out-group. Three  
546 categorical environmental variables were tested, including pond of isolation, high  
547 and low nutrient concentrations, and the two sampled environments (water or  
548 sediment).

549 **Genome sequencing, assembly, and annotation.** For whole-genome  
550 sequencing, we selected from the AdaptML analysis 39 *Vibrio* spp. isolates, 23  
551 isolated from sediment and 16 from water, plus 3 isolates of *Photobacterium* spp.  
552 (a lineage closely related to the *Vibrio* spp. genus) isolated from sediment. DNA  
553 extractions were performed with the DNeasy Blood and Tissue kit (Qiagen).

554 Sequencing was performed with Illumina MiSeq 2x250 technology, with  
555 insert libraries of 650 bps and an expected coverage of ca.10x per genome. At

556 first, we planned an assembly strategy using a genome reference; for this reason,  
557 the strain V15\_P4S5T153 had a second library that was designed using the Jr 454  
558 Roche technology, in order to reduce sequencing bias and get higher coverage.  
559 However, due to divergence among genomes, we performed *de novo* assemblies  
560 for all genomes. All sequencing was performed at the Laboratorio Nacional de  
561 Genómica para la Biodiversidad (LANGEBIO), México.

562 The quality of raw reads was analyzed using FASTQC software  
563 (<http://www.bioinformatics.babraham.ac.uk/projects/fastqc/>). A minimum quality  
564 value of 25 was set, and low-quality sequences were removed with  
565 `fastq_quality_filter` from the FASTX-Toolkit  
566 ([http://hannonlab.cshl.edu/fastx\\_toolkit/index.html](http://hannonlab.cshl.edu/fastx_toolkit/index.html)). Adapter sequences were  
567 identified, removed and paired-end reads were merged using SeqPrep  
568 (<https://github.com/jstjohn/SeqPrep>). *De novo* assemblies were performed with  
569 Newbler (Roche/ 454 Life Sciences) using both single-end and merged reads.

570 For scaffolding process, we used SSPACE [77], gaps were closed using  
571 GapFiller [78] and final error correction was performed with iCORN [79] (Additional  
572 file 2: Table 10). Coding sequences were inferred with Prodigal 2.0 [80]  
573 implemented in PROKKA software [81]. InterProScan 5 allowed annotation [82]  
574 with the databases enabled by default. Genome completeness was assessed with  
575 BUSCO using the Gamma-proteobacteria database [38].

576 **Pan-genome analyses.** The 42 genomes from CCB where compared with  
577 genomes of 5 reference *Vibrio* spp. strains: *Vibrio alginolyticus* NBRC 15630 =  
578 ATCC 17749, *V. anguillarum* 775, *V. furnissii* NCTC 11218, *V. parahaemolyticus*  
579 BB22OP and *V. metschnikovii* CIP 69 14 (Additional file 1: Tables 4, 5; Additional  
580 file 2: Tables 10). Ortholog gene families were predicted from all 47 genomes using  
581 the DeNoGAP comparative genomics pipeline [83]. To minimize false positive  
582 prediction of orthologs, we assigned *Photobacterium* spp. genomes as outgroup.  
583 The completely sequenced genome of *V. anguillarum* strain 775 was used as seed  
584 reference.

585           We estimated the core genome based on presence and absence of gene  
586 families across the genomes. If the genes were present in all strains, the orthologs  
587 were classified as *core*, while genes were classified as *accessory* when present in  
588 more than one strain but not in all of them, and *unique* genes when it was present  
589 only in a single strain. Since most of the genomes in our dataset are not completely  
590 sequenced, we designated core ortholog families as those present in at least 95%  
591 of the genomes, to avoid the impact of missing genes due to sequencing or  
592 assembly artifacts.

593           The package Micropan [84] within R v.3.4 (R Core Team) [85] was used to  
594 infer the open or closed nature of each pan-genome dataset, following the heaps  
595 law proposed by Tettelin *et al.* [42]. The Heaps law model is fitted to the number of  
596 new gene clusters observed when genomes are ordered randomly. The model has  
597 two parameters: an intercept, and a decay parameter called alpha. If alpha is  
598 higher than 1.0 the pan-genome is considered closed, if alpha is lower than 1.0 it is  
599 considered open. Additionally, a random sub-sampling for each clade was made,  
600 taking three genomes and calculating the alpha value for each group of three  
601 genomes. A total of 1,000 independent sub-sampling events were made for each  
602 clade.

603           Core proteins were aligned using Kalign [86] to infer the phylogenetic  
604 relationship between the samples. The resulting alignments of individual ortholog  
605 families were concatenated using a custom Perl script. With these concatenated  
606 core genes, a maximum likelihood phylogenetic tree was constructed using the  
607 FastTree program [87].

608           **Recombination analyses.** Of the total ortholog families in the *Vibrio* spp. pan-  
609 genome, we only used the ortholog families found in at least three genomes for the  
610 recombination analyses. Genetic recombination was examined on each CDS  
611 alignment by using inference of pairwise recombination sites, obtained with  
612 GENECONV [88] and by the identification of putative recombinant sequences  
613 through breakpoints using GARD [89].



614           Based on the number of recombination events, we estimated the events  
615 shared among isolates of the same pond and environment, among isolates of the  
616 different pond and environment, among isolates of the same pond and different  
617 environment and among isolates of different pond and environment. For this, we  
618 normalized the data by pan-genome size, number of strains and branch length.  
619 Given that the large generalist Clade II presented a clear sub-structure, we did a  
620 separated analysis for the shorter branches within Clade II (Additional file 1: Figure  
621 4).

622           To assess the impact of homologous recombination, we analyzed the  
623 substitution pattern using two different algorithms, Gubbins [90] and  
624 ClonalFrameML [43]. A whole-genome alignment for the 47 analyzed genomes  
625 was performed with MAUVE [91]. The resulting alignment was used as input for  
626 Gubbins [90] using RAxML [92] and default parameters. Additionally, whole  
627 genome alignments were performed for each clade, excluding references, with the  
628 progressive MAUVE algorithm [91]. We calculated the R/theta ratio, nu and delta  
629 [43] for each sample and for 100 bootstrapped replicates.

630   **Genetic structure of Clade II.** Recombination analyses showed that in Clade II  
631 there are internal groups with higher internal recombination, so we decided to  
632 further investigate the structure within Clade II. For clustering analyses, we used  
633 Nei's genetic distance [93] and neighbor joining. Genomes with distance less than  
634 0.001 were grouped and tested with a discriminant analysis of principal  
635 components of the genetic variation, using the adegenet library in R [94]. For this  
636 study, we used 20 principal components and 3 discriminant functions.

637

638   **Selection analyses.** We used FUBAR [95] to identify signatures of positive  
639 selection among ortholog gene families found in at least three genomes. We  
640 accounted for recombination breakpoints in the ortholog families, while calculating  
641 positively selected sites based on GARD results [89]. We considered any site to be  
642 positively selected if it showed P-value  $\leq 0.05$ . We also conducted a Gene



643 Ontology (GO) enrichment analysis using topGO [45] to find overrepresented  
644 biological functions in this set of genes.

645 **Effective population size estimation.** We followed a simulation approach to  
646 estimate the posterior distribution of the effective population size ( $N_e$ ) of each of  
647 the six clades. According to the previous clustering and recombination analysis, for  
648 Clades I, III, IV, V and VI we simulated a single population, while for Clade II we  
649 simulated three sub-populations that diverged from an ancestral population.

650 Simulations were performed using Fastsimcoal2 [44, 96]. For each clade,  
651 we simulated DNA sequences having a similar length equal to the number of  
652 nucleotides in the given clade, as well as a sample size equal to the number of  
653 sequences sampled for each clade. We assumed no recombination within the  
654 genome, and used the *Escherichia coli* mutation rate of  $2.2 \times 10^{-10}$  mutations per  
655 nucleotide per generation [97]. We ran between two and four simulations for each  
656 clade. For the initial runs, we generated 100,000 replicates extracting  $N_e$  values  
657 from a prior log-uniform distribution that ranged from 100,000 to 20,000,000  
658 individuals. For Clade II, we also estimated the age of divergence of each Sub-  
659 clade, by setting the prior distribution of time ranging from 1,000-4,000,000  
660 generations. After a first run, we narrowed the prior ranges based on those  
661 simulations that had similar summary statistics compared to the observed data and  
662 performed another 100,000 simulations using the narrowed priors.

663 To compare the previously simulated and observed data based on summary  
664 statistics, we used the ape [98] and pegas [99] libraries in R to estimate the  
665 number of polymorphic sites and the Tajima's  $D$  based on the entire genomes.  
666 Tajima's  $D$  is commonly used to estimate demographic changes in populations  
667 [100, 101]. Also, we obtained 1,000 sliding windows frames to estimate the  
668 Tajima's  $D$  along the genomes, as well as the mean and standard deviation of  
669 Tajima's  $D$ . Tajima's  $D$ ,  $\pi$ , and Watterson's theta ( $\theta_w$ ) were estimated for each  
670 clade as well as for Sub-clades A, B and G. Since clades I and VI had three  
671 sequences and it was not possible to obtain Tajima's  $D$ , we did 1,000 replicates in  
672 which we subsampled with replacement 10 sequences. For each replicate, we

673 calculated Tajima's  $D$  and we obtained as the proximate value the median  
674 estimated across the 1,000 replicates.

675         Based on the summary statistics, we used the `abc` function in the ABC  
676 package [102] in R to calculate the distribution of the  $N_e$  parameter based on a  
677 0.05 % threshold distance between the simulated and observed data. For each  
678 clade, we report the median and the 95% interval confidence of  $N_e$ . For Clade II,  
679 we further reported the average and 95% interval confidence of the number of  
680 generations since each Sub-clade diverged from an ancestral clade.

681         **Association between genotypes and environmental variables.** We evaluated  
682 whether the genetic variation within the Vibrionaceae genomes could be explained  
683 by particular adaptations to the environment (water or sediment). We used  
684 progressiveMauve [91] to perform a global multiple alignment between the  
685 assembled genomes. We extracted the variant sites within the alignment and  
686 exported them as SNPs using `snp-sites` [103].

687         We obtained 38,533 SNPs, which we used to search for private alleles using  
688 Poppr [104]. Afterwards, we obtained a subset of 25,892 SNPs by filtering biallelic  
689 sites with minor allele frequencies  $> 0.05$ . We used PLINK [105] to perform a  
690 GWAS to detect possible associations between our SNP set and either the water  
691 or sediment environments. We conducted Fisher exact tests and regarded as  
692 significant all SNPs whose associations had  $p$ -values  $< 0.01$  after Bonferroni  
693 corrections. These analyses may be informative even considering these sampling  
694 differences [106, 107].

695         To test whether these associations could be explained by convergent  
696 evolution rather than by common ancestry, we compared an UPGMA tree  
697 reconstructed from the total set of SNPs from an UPGMA tree using only the SNPs  
698 that were significantly associated to the environment. We analyzed the distribution  
699 of the SNPs within the genomes to find the genes associated to those SNPs.

700         We mapped the SNPs positions in the genome alignment moving by 1 Kb  
701 windows; this window size was selected considering the average bacterial gene

702 size and retrieved all the associated genes. We conducted a Gene Ontology (GO)  
703 enrichment analysis using topGO [45] to find overrepresented biological functions  
704 in this set of genes.

#### 705 **Availability of data and materials**

706 The datasets generated and analysed during the current study are available in the  
707 genome assembly project BioProject: PRJNA361510; PRJNA361511. The  
708 resulting InterProScan annotation files, CDS fasta files and the predicted protein  
709 fasta files for all taxa are available at Dryad. As by the politics of Dryad, the data  
710 will be available once the manuscript is accepted.

#### 711 **Competing interests**

712 The authors declare that they have no competing interests

#### 713 **Funding**

714 MV-R-L was a doctoral student from Programa de Doctorado en Ciencias  
715 Biomédicas, Universidad Nacional Autónoma de México (UNAM) and got a  
716 fellowship 345250 from CONACYT. This research was also supported by funding  
717 from PAPIIT project IG200215 and WWF-Alianza Carlos Slim, SEP-Ciencia Básica  
718 CONACYT grant 238245 to both VS and LEE. The paper was written during a  
719 sabbatical leave of LEE and VS at the University of Minnesota in Peter Tiffin and  
720 Michael Travisano laboratories, respectively, both with support by scholarships  
721 from PASPA, DGAPA, UNAM.

#### 722 **Author Contributions.**

723 MV-R-L design the sampling, obtained the biological material, analyzed the data,  
724 prepared figures and tables, and wrote the paper. GYP-S analyzed the data and  
725 participated in all stages of writing. JA-L, ST, ES, and JB-R analyzed the data. EI-L  
726 analyzed the data and provided computing facilities. DS-G provided computing  
727 facilities and contributed substantially to the analysis and discussion of the data.  
728 LEE made contributions for the design, analysis, discussion of the data and writing.

729 V-S conceived, designed the study and the analyses, managed the obtaining  
730 financial resources and participated in all stages of writing.

### 731 **Acknowledgments.**

732 We thank Felipe García-Oliva and Rodrigo Velázquez-Durán at the Instituto de  
733 Investigaciones en Ecosistemas y Sustentabilidad, UNAM for performing the  
734 biogeochemical analysis. Laura Espinosa-Asuar and Erika Aguirre-Planter  
735 provided technical and logistical assistance during the project.

### 736 **References.**

- 737 1. Lilburn TG, Gu J, Cai H, Wang Y. Comparative genomics of the family  
738 vibrionaceae reveals the wide distribution of genes encoding virulence-associated  
739 proteins. *BMC Genomics*. 2010;11:369. doi:10.1186/1471-2164-11-369.
- 740 2. Moriel DG, Tan L, Goh KGK, Phan M-D, Ipe DS, Lo AW, et al. A novel  
741 protective vaccine antigen from the core *Escherichia coli* genome. *mSphere*.  
742 2016;1. doi:10.1128/msphere.00326-16.
- 743 3. Sanglas A, Albarral V, Farfán M, Lorén JG, Fusté MC. Evolutionary roots and  
744 diversification of the genus *Aeromonas*. *Frontiers in Microbiology*. 2017;8.  
745 doi:10.3389/fmicb.2017.00127.
- 746 4. Lapierre P, Gogarten JP. Estimating the size of the bacterial pan-genome.  
747 *Trends in Genetics*. 2009;25:107–10. doi:10.1016/j.tig.2008.12.004.
- 748 5. Collins RE, Higgs PG. Testing the infinitely many genes model for the evolution  
749 of the bacterial core genome and pangenome. *Molecular Biology and Evolution*.  
750 2012;29:3413–25. doi:10.1093/molbev/mss163.
- 751 6. Gordienko EN, Kazanov MD, Gelfand MS. Evolution of pan-genomes of  
752 *Escherichia coli*, *Shigella* spp., and *Salmonella enterica*. *Journal of Bacteriology*.  
753 2013;195:2786–92. doi:10.1128/jb.02285-12.
- 754 7. Valdivia-Anistro JA, Eguiarte-Frúns LE, Delgado-Sapién G, Gasca-Pineda PM-  
755 ZJ, Learned J, Elser JJ, et al. Variability of rRNA operon copy number and growth

- 756 rate dynamics of bacillus isolated from an extremely oligotrophic aquatic  
757 ecosystem. *Frontiers in Microbiology*. 2016;6. doi:10.3389/fmicb.2015.01486
- 758 8. Zhi X-Y, Jiang Z, Yang L-L, Huang Y. The underlying mechanisms of genetic  
759 innovation and speciation in the family corynebacteriaceae : A phylogenomics  
760 approach. *Molecular Phylogenetics and Evolution*. 2017;107:246–55.  
761 doi:10.1016/j.ympev.2016.11.009.
- 762 9. Hou Y, Lin S. Distinct gene number-genome size relationships for eukaryotes  
763 and non-eukaryotes: Gene content estimation for dinoflagellate genomes. *PLoS*  
764 *ONE*. 2009;4:e6978. doi:10.1371/journal.pone.0006978.
- 765 10. McInerney JO, McNally A, O MJ. Why prokaryotes have pangenomes. *Nature*  
766 *Microbiology*. 2017;2. doi:10.1038/nmicrobiol.2017.40.
- 767 11. Kuo C-H, Ochman H. Deletional bias across the three domains of life.  
768 *Genome Biology and Evolution*. 2009;1:145–52. doi:10.1093/gbe/evp016.
- 769 12. Morris JJ, Lenski RE, Zinser ER. The black queen hypothesis: Evolution of  
770 dependencies through adaptive gene loss. *mBio*. 2012;3. doi:10.1128/mbio.00036
- 771 13. Mas A, Jamshidi S, Lagadeuc Y, Eveillard D, Vandenkoornhuysse P. Beyond  
772 the black queen hypothesis. *The ISME Journal*. 2016;10:2085–91.  
773 doi:10.1038/ismej.2016.22.
- 774 14. Tettelin H, Massignani V, Cieslewicz MJ, Donati C, Medini D, Ward NL, et al.  
775 Genome analysis of multiple pathogenic isolates of *Streptococcus agalactiae*:  
776 Implications for the microbial "pan-genome". *Proceedings of the National Academy*  
777 *of Sciences*. 2005;102:13950–5. doi:10.1073/pnas.0506758102.
- 778 15. Andreani NA, Hesse E, Vos M. Prokaryote genome fluidity is dependent on  
779 effective population size. *The ISME Journal*. 2017;11:1719–21.  
780 doi:10.1038/ismej.2017.36.
- 781 16. Smith JM, Smith NH, Spratt MOBG. How clonal are bacteria? *Proceedings of*  
782 *the National Academy of Sciences*. 1993;90:4384–8. doi:10.1073/pnas.90.10.4384.

- 783 17. Souza V, Eguiarte LE. Bacteria gone native vs. bacteria gone awry?:  
784 Plasmidic transfer and bacterial evolution. *Proceedings of the National Academy of*  
785 *Sciences*. 1997;94:5501–3. doi:10.1073/pnas.94.11.5501.
- 786 18. Lawrence JG, Ochman H. Molecular archaeology of the *Escherichia coli*  
787 genome. *Proceedings of the National Academy of Sciences*. 1998;95:9413–7.  
788 doi:10.1073/pnas.95.16.9413.
- 789 19. Ochman H, Lawrence JG, Groisman EA. Lateral gene transfer and the nature  
790 of bacterial innovation. *Nature*. 2000;405:299–304. doi:10.1038/35012500.
- 791 20. Fournier GP, Gogarten JP. Evolution of acetoclastic methanogenesis in  
792 *methanosarcina* via horizontal gene transfer from cellulolytic clostridia. *Journal of*  
793 *Bacteriology*. 2007;190:1124–7. doi:10.1128/jb.01382-07.
- 794 21. Soucy SM, Fullmer MS, Papke RT, Gogarten JP. Inteins as indicators of gene  
795 flow in the halobacteria. *Frontiers in Microbiology*. 2014;5.  
796 doi:10.3389/fmicb.2014.00299.
- 797 22. Roze D, Barton NH. The hill Robertson effect and the evolution of  
798 recombination. *Genetics*. 2006;173:1793–811. doi:10.1534/genetics.106.058586.
- 799 23. Comeron JM, Williford A, Kliman RM. The hill Robertson effect: Evolutionary  
800 consequences of weak selection and linkage in finite populations. *Heredity*.  
801 2007;100:19–31. doi:10.1038/sj.hdy.6801059.
- 802 24. Souza V, Nguyen TT, Hudson RR, Pinero D, Lenski RE. Hierarchical analysis  
803 of linkage disequilibrium in *Rhizobium* populations: Evidence for sex? *Proceedings*  
804 *of the National Academy of Sciences*. 1992;89:8389–93.  
805 doi:10.1073/pnas.89.17.8389.
- 806 25. Bobay L-M, Ochman H. Factors driving effective population size and pan-  
807 genome evolution in bacteria. *BMC Evolutionary Biology*. 2018;18.  
808 doi:10.1186/s12862-018-1272-4.
- 809 26. Cohan FM. Bacterial species and speciation. *Systematic Biology*.  
810 2001;50:513–24. doi:10.1080/10635150118398.

- 811 27. Souza V, Moreno-Letelier A, Trivisano M, Alcaraz LD, Olmedo G, Eguiarte  
812 LE. The lost world of Cuatro Ciénegas basin, a relictual bacterial niche in a desert  
813 oasis. *eLife*. 2018;7. doi:10.7554/elife.38278.
- 814 28. Escalante AE, Eguiarte LE, Espinosa-Asuar L, Forney LJ, Noguez AM,  
815 Saldivar VS. Diversity of aquatic prokaryotic communities in the Cuatro Cienegas  
816 basin. *FEMS Microbiology Ecology*. 2008;65:50–60. doi:10.1111/j.1574-  
817 6941.2008.00496.x.
- 818 29. Rebollar EA, Avitia M, Eguiarte LE, González-González A, Mora L, Bonilla-  
819 Rosso G, et al. Water-sediment niche differentiation in ancient marine lineages of  
820 *Exiguobacterium* endemic to the Cuatro Cienegas basin. *Environmental*  
821 *Microbiology*. 2012;14:2323–33. doi:10.1111/j.1462-2920.2012.02784.x.
- 822 30. Avitia M, Escalante AE, Rebollar EA, Moreno-Letelier A, Eguiarte LE, Souza  
823 V. Population expansions shared among coexisting bacterial lineages are revealed  
824 by genetic evidence. *PeerJ*. 2014;2:e696. doi:10.7717/peerj.696.
- 825 31. Souza V, Eguiarte LE, Siefert J, Elser JJ. Microbial endemism: Does  
826 phosphorus limitation enhance speciation? *Nature Reviews Microbiology*.  
827 2008;6:559–64. doi:10.1038/nrmicro1917.
- 828 32. Souza V, Eguiarte LE, Trivisano M, Elser JJ, Rooks C, Siefert JL. Travel,  
829 sex, and food: What's speciation got to do with it? *Astrobiology*. 2012;12:634–40.  
830 doi:10.1089/ast.2011.0768.
- 831 33. Vos M, Didelot X. A comparison of homologous recombination rates in  
832 bacteria and archaea. *The ISME Journal*. 2008;3:199–208.  
833 doi:10.1038/ismej.2008.93.
- 834 34. Cui Y, Yang X, Didelot X, Guo C, Li D, Yan Y, et al. Epidemic clones, oceanic  
835 gene pools, and eco-LD in the free living marine pathogen *Vibrio*  
836 *parahaemolyticus*. *Molecular Biology and Evolution*. 2015;32:1396–410.  
837 doi:10.1093/molbev/msv009.



- 838 35. Peimbert M, Alcaraz LD, Bonilla-Rosso G, Olmedo-Alvarez G, Garc-Oliva F,  
839 Segovia L, et al. Comparative metagenomics of two microbial mats at Cuatro  
840 Ciénegas basin II: Ancient lessons on how to cope with an environment under  
841 severe nutrient stress. *Astrobiology*. 2012;12:648–58. doi:10.1089/ast.2011.0694.
- 842 36. Redfield AC. James Johnstone Memorial Volume. Daniel RJ, ed. Liverpool  
843 Univ. Press;1934. p. 176-92
- 844 37. Hunt DE, David LA, Gevers D, Preheim SP, Alm EJ, Polz MF. Resource  
845 partitioning and sympatric differentiation among closely related bacterioplankton.  
846 *Science*. 2008;320:1081–5. doi:10.1126/science.1157890.
- 847 38. Simão FA, Waterhouse RM, Ioannidis P, Kriventseva EV, Zdobnov EM.  
848 BUSCO: Assessing genome assembly and annotation completeness with single-  
849 copy orthologs. *Bioinformatics*. 2015;31:3210–2.  
850 doi:10.1093/bioinformatics/btv351.
- 851 39. Lux TM, Lee R, Love J. Complete genome sequence of a free-living *Vibrio*  
852 *furnissii* sp. nov. strain (NCTC 11218). *Journal of Bacteriology*. 2011;193:1487–8.  
853 doi:10.1128/jb.01512-10.
- 854 40. Naka H, Dias GM, Thompson CC, Dubay C, Thompson FL, Crosa JH.  
855 Complete genome sequence of the marine fish pathogen *Vibrio anguillarum*  
856 harboring the pJM1 virulence plasmid and genomic comparison with other virulent  
857 strains of *V. anguillarum* and *V. ordalii*. *Infection and Immunity*. 2011;79:2889–900.  
858 doi:10.1128/iai.05138-11.
- 859 41. Xu F, Ilyas S, Hall JA, Jones SH, Cooper VS, Whistler CA. Genetic  
860 characterization of clinical and environmental *Vibrio parahaemolyticus* from the  
861 northeast USA reveals emerging resident and non-indigenous pathogen lineages.  
862 *Frontiers in Microbiology*. 2015;6. doi:10.3389/fmicb.2015.00272.
- 863 42. Tettelin H, Riley D, Cattuto C, Medini D. Comparative genomics: The bacterial  
864 pan-genome. *Current Opinion in Microbiology*. 2008;11:472–7.  
865 doi:10.1016/j.mib.2008.09.006.

- 866 43. Didelot X, Wilson DJ. ClonalFrameML: Efficient inference of recombination in  
867 whole bacterial genomes. *PLOS Computational Biology*. 2015;11:e1004041.  
868 doi:10.1371/journal.pcbi.1004041.
- 869 44. Excoffier L, Foll M. Fastsimcoal: A continuous-time coalescent simulator of  
870 genomic diversity under arbitrarily complex evolutionary scenarios. *Bioinformatics*.  
871 2011;27:1332–4. doi:10.1093/bioinformatics/btr124.
- 872 45. Alexa A, Rahnenfuhrer J, Lengauer T. Improved scoring of functional groups  
873 from gene expression data by decorrelating GO graph structure. *Bioinformatics*.  
874 2006;22:1600–7. doi:10.1093/bioinformatics/btl140.
- 875 46. Taboada B, Isa P, Gutiérrez-Escolano AL, del Ángel RM, Ludert JE, Vázquez  
876 N, et al. The geographic structure of viruses in the Cuatro Ciénegas basin, a  
877 unique oasis in northern Mexico, reveals a highly diverse population on a small  
878 geographic scale. *Applied and Environmental Microbiology*. 2018;84.  
879 doi:10.1128/aem.00465-18.
- 880 47. Souza V, Espinosa-Asuar L, Escalante AE, Eguiarte LE, Farmer J, Forney L,  
881 et al. An endangered oasis of aquatic microbial biodiversity in the Chihuahuan  
882 desert. *Proceedings of the National Academy of Sciences*. 2006;103:6565–70.  
883 doi:10.1073/pnas.0601434103.
- 884 48. Montiel-González C, Bautista F, Delgado C, García-Oliva F. The Climate of  
885 Cuatro Ciénegas Basin: Drivers and Temporal Patterns. In Souza V, Olmedo-  
886 Álvarez G, Eguiarte LE, eds. *Cuatro Ciénegas Ecology, Natural History and*  
887 *Microbiology*. New York, NY:Springer, Cham; 2018. p. 35-42
- 888 49. Bonilla-Rosso G, Peimbert M, Alcaraz LD, Hernández I, Eguiarte LE, Olmedo-  
889 Alvarez G, et al. Comparative metagenomics of two microbial mats at Cuatro  
890 Ciénegas basin II: Community structure and composition in oligotrophic  
891 environments. *Astrobiology*. 2012;12:659–73. doi:10.1089/ast.2011.0724.
- 892 50. Lee ZM-P, Poret-Peterson AT, Siefert JL, Kaul D, Moustafa A, Allen AE, et al.  
893 Nutrient stoichiometry shapes microbial community structure in an evaporitic  
894 shallow pond. *Frontiers in Microbiology*. 2017;8. doi:10.3389/fmicb.2017.00949.

- 895 51. Anda VD, Zapata-Peñasco I, Blaz J, Poot-Hernández AC, Contreras-Moreira  
896 B, González-Laffitte M, et al. Understanding the mechanisms behind the response  
897 to environmental perturbation in microbial mats: A metagenomic-network based  
898 approach. *Frontiers in Microbiology*. 2018;9. doi:10.3389/fmicb.2018.02606.
- 899 52. Ponce-Soto GY, Aguirre-von-Wobeser E, Eguiarte LE, Elser JJ, Lee ZM-P,  
900 Souza V. Enrichment experiment changes microbial interactions in an ultra-  
901 oligotrophic environment. *Frontiers in Microbiology*. 2015;6.  
902 doi:10.3389/fmicb.2015.00246.
- 903 53. Ghalayini M, Launay A, Bridier-Nahmias A, Clermont O, Denamur E, Lescat  
904 M, et al. Evolution of a dominant natural isolate of *Escherichia coli* in the human gut  
905 over the course of a year suggests a neutral evolution with reduced effective  
906 population size. *Applied and Environmental Microbiology*. 2018;84.  
907 doi:10.1128/aem.02377-17.
- 908 54. Farfan M, Minana-Galbis D, Fuste MC, Loren JG. Allelic diversity and  
909 population structure in *Vibrio cholerae* O139 Bengal based on nucleotide sequence  
910 analysis. *Journal of Bacteriology*. 2002;184:1304–13. doi:10.1128/jb.184.5.1304-  
911 1313.2002.
- 912 55. Gonzalez-Escalona N, Martinez-Urtaza J, Romero J, Espejo RT, Jaykus L-A,  
913 DePaola A. Determination of molecular phylogenetics of *Vibrio parahaemolyticus*  
914 strains by multilocus sequence typing. *Journal of Bacteriology*. 2008;190:2831–40.  
915 doi:10.1128/jb.01808-07.
- 916 56. Korneliusson TS, Moltke I, Albrechtsen A, Nielsen R. Calculation of Tajima's *D*  
917 and other neutrality test statistics from low depth next-generation sequencing data.  
918 *BMC Bioinformatics*. 2013;14. doi:10.1186/1471-2105-14-289.
- 919 57. Petit N, Barbadilla A. Selection efficiency and effective population size in  
920 *Drosophila* species. *Journal of Evolutionary Biology*. 2009;22:515–26.  
921 doi:10.1111/j.1420-9101.2008.01672.x.

- 922 58. Jensen JD, Bachtrog D. Characterizing the influence of effective population  
923 size on the rate of adaptation: Gillespie's darwin domain. *Genome Biology and*  
924 *Evolution*. 2011;3:687–701. doi:10.1093/gbe/evr063.
- 925 59. Gossmann TI, Keightley PD, Eyre-Walker A. The effect of variation in the  
926 effective population size on the rate of adaptive molecular evolution in eukaryotes.  
927 *Genome Biology and Evolution*. 2012;4:658–67. doi:10.1093/gbe/evs027.
- 928 60. Shapiro BJ, Friedman J, Cordero OX, Preheim SP, Timberlake SC, Szabó G,  
929 et al. Population genomics of early events in the ecological differentiation of  
930 bacteria. *Science*. 2012;336:48–51. doi:10.1126/science.1218198.
- 931 61. Vozza NF, Abdian PL, Russo DM, Mongiardini E, Lodeiro A, Molin S, et al. A  
932 *Rhizobium leguminosarum* CHDL- (cadherin-like-) lectin participates in assembly  
933 and remodeling of the biofilm matrix. *Frontiers in Microbiology*. 2016;7.  
934 doi:10.3389/fmicb.2016.01608.
- 935 62. Kurz M, Brünig AN, Galinski EA. NhaD type sodium/proton-antiporter of  
936 *Halomonas elongata*: a salt stress response mechanism in marine habitats? *Saline*  
937 *Systems*. 2006;2:10. doi:10.1186/1746-1448-2-10
- 938 63. Vimont S, Berche P. NhaA, an Na(+)/H(+) antiporter involved in environmental  
939 survival of *Vibrio cholerae*. *Journal of Bacteriology*. 2000;182:2937–44.  
940 doi:10.1128/jb.182.10.2937-2944.2000.
- 941 64. Wolaver BD, Crossey LJ, Karlstrom KE, Banner JL, Cardenas MB, Ojeda CG,  
942 et al. Identifying origins of and pathways for spring waters in a semiarid basin using  
943 he, sr, and c isotopes: Cuatro Ciénegas basin, Mexico. *Geosphere*. 2012;9:113–  
944 25. doi:10.1130/ges00849.1.
- 945 65. Vázquez-Rosas-Landa M, Ponce-Soto GY, Eguiarte LE, Souza V.  
946 Comparative genomics of free-living gammaproteobacteria: Pathogenesis-related  
947 genes or interaction-related genes? *Pathogens and Disease*. 2017;75.  
948 doi:10.1093/femspd/ftx059.

- 949 66. Huffman EW. Performance of a new automatic carbon dioxide coulometer.  
950 *Microchemical Journal*. 1977;22:567–73. doi:10.1016/0026-265x(77)90128-x.
- 951 67. Bremner JM. Total nitrogen. In: Sparks DL ed. *Methods of Soil Analysis. Part*  
952 *2 Chemical Methods*. Madison, WI: Soil Science Society of America; 1996. p.  
953 1085-6
- 954 68. Murphy J, Riley J. A modified single solution method for the determination of  
955 phosphate in natural waters. *Analytica Chimica Acta*. 1962;27:31–6.  
956 doi:10.1016/s0003-2670(00)88444-5.
- 957 69. Aljanabi S. Universal and rapid salt-extraction of high quality genomic DNA for  
958 PCR- based techniques. *Nucleic Acids Research*. 1997;25:4692–3.  
959 doi:10.1093/nar/25.22.4692.
- 960 70. Lane DJ. 16S/23S rRNA Sequencing. In: Stackebrandt E, Goodfellow M, eds.  
961 *Nucleic Acid Techniques in Bacterial Systematic*. New York: John Wiley and Sons;  
962 1991. p. 115-75
- 963 71. Larkin M, Blackshields G, Brown N, Chenna R, McGettigan P, McWilliam H, et  
964 al. Clustal W and Clustal X version 2.0. *Bioinformatics*. 2007;23:2947–8.  
965 doi:10.1093/bioinformatics/btm404.
- 966 72. Schloss PD, Westcott SL, Ryabin T, Hall JR, Hartmann M, Hollister EB, et al.  
967 Introducing mothur: Open-source, platform-independent, community-supported  
968 software for describing and comparing microbial communities. *Applied and*  
969 *Environmental Microbiology*. 2009;75:7537–41. doi:10.1128/aem.01541-09.
- 970 73. Wang Q, Garrity GM, Tiedje JM, Cole JR. Naive bayesian classifier for rapid  
971 assignment of rRNA sequences into the new bacterial taxonomy. *Applied and*  
972 *Environmental Microbiology*. 2007;73:5261–7. doi:10.1128/aem.00062-07.
- 973 74. Cole JR, Wang Q, Cardenas E, Fish J, Chai B, Farris RJ, et al. The ribosomal  
974 database project: Improved alignments and new tools for rRNA analysis. *Nucleic*  
975 *Acids Research*. 2009;37 Database:D141–5. doi:10.1093/nar/gkn879.

- 976 75. Guindon S, Dufayard J-F, Lefort V, Anisimova M, Hordijk W, Gascuel O. New  
977 algorithms and methods to estimate maximum-likelihood phylogenies: Assessing  
978 the performance of PhyML 3.0. *Systematic Biology*. 2010;59:307–21.  
979 doi:10.1093/sysbio/syq010.
- 980 76. Darriba D, Taboada GL, Doallo R, Posada D. jModelTest 2: More models,  
981 new heuristics and parallel computing. *Nature Methods*. 2012;9:772–2.  
982 doi:10.1038/nmeth.2109.
- 983 77. Boetzer M, Henkel CV, Jansen HJ, Butler D, Pirovano W. Scaffolding pre-  
984 assembled contigs using SSPACE. *Bioinformatics*. 2010;27:578–9.  
985 doi:10.1093/bioinformatics/btq683.
- 986 78. Nadalin F, Vezzi F, Policriti A. GapFiller: A de novo assembly approach to fill  
987 the gap within paired reads. *BMC Bioinformatics*. 2012;13. doi:10.1186/1471-2105-  
988 13-s14-s8.
- 989 79. Otto TD, Sanders M, Berriman M, Newbold C. Iterative correction of reference  
990 nucleotides (iCORN) using second generation sequencing technology.  
991 *Bioinformatics*. 2010;26:1704–7. doi:10.1093/bioinformatics/btq269.
- 992 80. Hyatt D, Chen G-L, LoCascio PF, Land ML, Larimer FW, Hauser LJ. Prodigal:  
993 Prokaryotic gene recognition and translation initiation site identification. *BMC*  
994 *Bioinformatics*. 2010;11. doi:10.1186/1471-2105-11-119.
- 995 81. Seemann T. Prokka: Rapid prokaryotic genome annotation. *Bioinformatics*.  
996 2014;30:2068–9. doi:10.1093/bioinformatics/btu153.
- 997 82. Jones P, Binns D, Chang H-Y, Fraser M, Li W, McAnulla C, et al.  
998 InterProScan 5: Genome-scale protein function classification. *Bioinformatics*.  
999 2014;30:1236–40. doi:10.1093/bioinformatics/btu031.
- 1000 83. Thakur S, Guttman DS. A de-novo genome analysis pipeline (DeNoGAP) for  
1001 large-scale comparative prokaryotic genomics studies. *BMC Bioinformatics*.  
1002 2016;17. doi:10.1186/s12859-016-1142-2.

- 1003 84. Snipen L, Liland KH. Micropan: An R-package for microbial pan-genomics.  
1004 BMC Bioinformatics. 2015;16. doi:10.1186/s12859-015-0517-0.
- 1005 85. R Core Team (2017). R: A language and environment for statistical  
1006 computing. R Foundation for Statistical Computing, Vienna, Austria.  
1007 (<https://www.R-project.org/>)
- 1008 86. Lassmann T, Frings O, Sonnhammer ELL. Kalign2: High-performance  
1009 multiple alignment of protein and nucleotide sequences allowing external features.  
1010 Nucleic Acids Research. 2008;37:858–65. doi:10.1093/nar/gkn1006.
- 1011 87. Price MN, Dehal PS, Arkin AP. FastTree 2 approximately maximum-likelihood  
1012 trees for large alignments. PLoS ONE. 2010;5:e9490.  
1013 doi:10.1371/journal.pone.0009490.
- 1014 88. Sawyer S. Statistical tests for detecting gene conversion. Molecular Biology  
1015 and Evolution. 1989;6:526-38. doi:10.1093/oxfordjournals.molbev.a040567
- 1016 89. Pond SLK, Posada D, Gravenor MB, Woelk CH, Frost SD. GARD: A genetic  
1017 algorithm for recombination detection. Bioinformatics. 2006;22:3096–8.  
1018 doi:10.1093/bioinformatics/btl474.
- 1019 90. Croucher NJ, Page AJ, Connor TR, Delaney AJ, Keane JA, Bentley SD, et al.  
1020 Rapid phylogenetic analysis of large samples of recombinant bacterial whole  
1021 genome sequences using gubbins. Nucleic Acids Research. 2014;43:e15–5.  
1022 doi:10.1093/nar/gku1196.
- 1023 91. Darling AE, Mau B, Perna NT. progressiveMauve: Multiple genome alignment  
1024 with gene gain, loss and rearrangement. PLoS ONE. 2010;5:e111147.  
1025 doi:10.1371/journal.pone.0011147.
- 1026 92. Stamatakis A. RAxML version 8: A tool for phylogenetic analysis and post-  
1027 analysis of large phylogenies. Bioinformatics. 2014;30:1312–3.  
1028 doi:10.1093/bioinformatics/btu033.
- 1029 93. Nei, M. (1978). Estimation of average heterozygosity and genetic distance  
1030 from a small number of individuals. Genetics, 89(3):583-590.



- 1031 94. Jombart T, Ahmed I. Adegnet 1.3-1: New tools for the analysis of genome-  
1032 wide SNP data. *Bioinformatics*. 2011;27:3070–1.  
1033 doi:10.1093/bioinformatics/btr521.
- 1034 95. Murrell B, Moola S, Mabona A, Weighill T, Sheward D, Pond SLK, et al.  
1035 FUBAR: A Fast, Unconstrained BAYesian AppRoximation for inferring selection.  
1036 *Molecular Biology and Evolution*. 2013;30:1196–205. doi:10.1093/molbev/mst030.
- 1037 96. Excoffier L, Dupanloup I, Huerta-Sánchez E, Sousa VC, Foll M. Robust  
1038 demographic inference from genomic and SNP data. *PLoS Genetics*.  
1039 2013;9:e1003905. doi:10.1371/journal.pgen.1003905.
- 1040 97. Lee H, Popodi E, Tang H, Foster PL. Rate and molecular spectrum of  
1041 spontaneous mutations in the bacterium *Escherichia coli* as determined by whole-  
1042 genome sequencing. *Proceedings of the National Academy of Sciences*.  
1043 2012;109:E2774–83. doi:10.1073/pnas.1210309109.
- 1044 98. Paradis E, Schliep K. Ape 5.0: An environment for modern phylogenetics and  
1045 evolutionary analyses in R. *Bioinformatics*. 2018;35:526–8.  
1046 doi:10.1093/bioinformatics/bty633.
- 1047 99. Paradis E. Pegas: An R package for population genetics with an integrated-  
1048 modular approach. *Bioinformatics*. 2010;26:419–20.  
1049 doi:10.1093/bioinformatics/btp696.
- 1050 100. Eckshtain-Levi N, Weisberg AJ, Vinatzer BA. The population genetic test  
1051 Tajima’s D identifies genes encoding pathogen-associated molecular patterns and  
1052 other virulence-related genes in *Ralstonia solanacearum*. *Molecular Plant*  
1053 *Pathology*. 2018;19:2187–92. doi:10.1111/mpp.12688.
- 1054 101. Shen H-M, Chen S-B, Cui Y-B, Xu B, Kassegne K, Abe EM, et al. Whole-  
1055 genome sequencing and analysis of *Plasmodium falciparum* isolates from China-  
1056 Myanmar border area. *Infectious Diseases of Poverty*. 2018;7.  
1057 doi:10.1186/s40249-018-0493-5.

- 1058 102. Csillery K, François O, Blum MGB. Abc: An R package for approximate  
1059 bayesian computation (ABC). *Methods in Ecology and Evolution*. 2012;3:475–9.  
1060 doi:10.1111/j.2041-210x.2011.00179.x.
- 1061 103. Page AJ, Taylor B, Delaney AJ, Soares J, Seemann T, Keane JA, et al.  
1062 SNP-sites: Rapid efficient extraction of SNPs from multi-FASTA alignments.  
1063 *Microbial Genomics*. 2016;2. doi:10.1099/mgen.0.000056.
- 1064 104. Kamvar ZN, Tabima JF, Grünwald NJ. Poppr: An r package for genetic  
1065 analysis of populations with clonal, partially clonal, and/or sexual reproduction.  
1066 *PeerJ*. 2014;2:e281. doi:10.7717/peerj.281.
- 1067 105. Purcell S, Neale B, Todd-Brown K, Thomas L, Ferreira MA, Bender D, et al.  
1068 PLINK: A tool set for whole-genome association and population-based linkage  
1069 analyses. *The American Journal of Human Genetics*. 2007;81:559–75.  
1070 doi:10.1086/519795.
- 1071 106. Li N, Stephens M. Modeling linkage disequilibrium and identifying  
1072 recombination hotspots using single-nucleotide polymorphism data. *Genetics*.  
1073 2003;165:2213-33
- 1074 107. Marchini J, Howie B. Genotype imputation for genome-wide association  
1075 studies. *Nature Reviews Genetics*. 2010;11:499–511. doi:10.1038/nrg2796
- 1076 108. Sung, W., Ackerman, M. S., Miller, S. F., Doak, T. G., & Lynch, M. Drift-barrier  
1077 hypothesis and mutation-rate evolution. *Proceedings of the National Academy of*  
1078 *Sciences* 109.45 (2012): 18488-18492. doi.org/10.1073/pnas.1216223109
- 1079 109. Sivasundar A, Hey J. Population genetics of *Caenorhabditis elegans*: the  
1080 paradox of low polymorphism in a widespread species. *Genetics*. 2003;163:147-57
- 1081
- 1082
- 1083

1084 **Tables**

1085 Table 1. Pan-genome metrics of each Vibrionaceae clades isolated from Poza

1086 Rojas, CCB.

| Group Clade             | Number of CCB genomes included in each clade | Pan-genome metrics |          |        |                       | Heaps law parameters |        |
|-------------------------|----------------------------------------------|--------------------|----------|--------|-----------------------|----------------------|--------|
|                         |                                              | Core               | Flexible | Unique | Total number of genes | Intercept value      | Alpha  |
| Clade I                 | 3                                            | 3617               | 346      | 603    | 4566                  | 692.8508             | 1.1293 |
| Clade II                | 22                                           | 1746               | 5770     | 1745   | 9261                  | 244.2096             | 0.7913 |
| Clade III               | 5                                            | 2672               | 718      | 324    | 3714                  | 658.0634             | 1.6625 |
| Clade IV                | 5                                            | 2055               | 1445     | 180    | 3680                  | 2726.7580            | 2.0000 |
| Clade V                 | 4                                            | 2853               | 1660     | 1332   | 5845                  | 1196.2571            | 1.3109 |
| Clade VI                | 3                                            | 2448               | 3476     | 1028   | 4992                  | 3295.5770            | 2.0000 |
| Vibrionaceae all Clades | 47                                           | 1254               | 14072    | 4795   | 20121                 | 2263.7472            | 0.6621 |

1087 The first column shows the Clade ID, next is the number of genomes used for the  
 1088 analysis regarding each clade, followed by the general metrics of pan-genome, and  
 1089 last columns show the heaps values obtained. If alpha >1.0 the pan-genome is  
 1090 considered closed if alpha <1.0 it is considered open.

1091

1092

1093

1094

1095

1096

1097 Table 2. Genetic diversity statistics.

| Clade     |                                                | Number of individuals | Number of segregating sites | $\pi$      | $\theta_w$ | Tajima's $D$ | P-value of Tajima's $D$ |
|-----------|------------------------------------------------|-----------------------|-----------------------------|------------|------------|--------------|-------------------------|
| Clade I   |                                                | 3                     | 100971                      | 0.0164894  | 0.0163978  | 0            | 0                       |
| Clade II  | All individuals                                | 22                    | 103197                      | 0.01148342 | 0.01106029 | 0.15738106   | 0.8582025               |
|           | All individuals in the three larger sub-Clades | 14                    | 49946                       | 0.00916203 | 0.00613614 | 2.23866585   | 0.02142617              |
|           | Sub-clade G                                    | 4                     | 13                          | 2.54E-06   | 2.77E-06   | -0.84306779  | 0.77323024              |
|           | Sub-clade D                                    | 6                     | 42                          | 5.47E-06   | 7.19E-06   | -1.52560731  | 0.02458297              |
|           | Sub-clade A                                    | 4                     | 82                          | 1.61E-05   | 1.75E-05   | -0.83190864  | 0.8020116               |
| Clade III |                                                | 5                     | 40593                       | 0.0051088  | 0.0061293  | -1.27467187  | 0.01772241              |
| Clade IV  |                                                | 5                     | 209                         | 2.86E-05   | 3.46E-05   | -1.31696234  | 0                       |

|          |  |   |        |            |            |             |            |
|----------|--|---|--------|------------|------------|-------------|------------|
| Clade V  |  | 4 | 34843  | 0.00398639 | 0.00434715 | -0.87361739 | 0.56601856 |
| Clade VI |  | 3 | 204388 | 0.04622002 | 0.04621538 | 0           | 0          |

1098 From left to right are displayed the values for segregation sites, nucleotide diversity  
1099 ( $\pi$ ) Watterson's theta ( $\theta_w$ ), Tajima's  $D$  and Tajima's  $D$   $p$ -value. The values were  
1100 estimated for all six Clades and Sub-clades with 3 or more individuals.

1101

1102

1103

1104

1105

1106

1107

1108

1109

1110

1111

1112

1113

1114

1115

1116

1117

1118 Table 3. Recombination vs. mutation estimates.

| Group Clade                | Recombination vs mutation estimates |            |
|----------------------------|-------------------------------------|------------|
|                            | rho/theta                           | <i>r/m</i> |
| Clade I                    | 0.1036                              | 2.7249     |
| Clade II                   | 0.1171                              | 0.5299     |
| Clade III                  | 0.1498                              | 1.1163     |
| Clade IV                   | 0.1437                              | 0.9090     |
| Clade V                    | 0.0278                              | 0.2825     |
| Clade VI                   | 0.0074                              | 0.0052     |
|                            |                                     |            |
| <i>P. leiognathi</i>       | 0.0064                              | 0.2261     |
| <i>V. anguillarum</i>      | 0.2889                              | 4.0014     |
| <i>V. ordalii</i>          | 0.0667                              | 0.5659     |
| <i>V. parahaemolyticus</i> | 0.0025                              | 0.1246     |

1119 First column shows the names of the CCB Clades and reference strains used for  
1120 the calculus. Second and third columns shows the Rho/theta and *r/m* estimates  
1121 [43].

1122

1123

1124

1125

1126

1127 Table 4. Estimates of effective population sizes obtained through simulations with  
 1128 Fastsimcoal2 [44, 96].

| Group Clade        | Sample size | Median Value | Range       |              | Environment    | Reference |
|--------------------|-------------|--------------|-------------|--------------|----------------|-----------|
|                    |             |              | Lower value | Larger value |                |           |
| Clade I            | 3           | 12,822,270   | 10,110,043  | 16,231,765   | Sediment       | This work |
| Clade II           |             |              |             |              |                |           |
| Sub-clade A        | 4           | 55,938       | 34,079      | 392,104      | Sediment       | This work |
| Sub-clade D        | 6           | 20,849       | 2,795       | 218,603      | Water-Sediment | This work |
| Sub-clade G        | 4           | 29,791       | 6,174       | 226,658      | Water-Sediment | This work |
| Clade III          | 4           | 15,018,880   | 8,970,283   | 22,432,331   | Water-Sediment | This work |
| Clade IV           | 4           | 383,067      | 345,564     | 427,557      | Sediment       | This work |
| Clade V            | 4           | 9,594,874    | 5,894,074   | 12,914,770   | Sediment       | This work |
| Clade VI           | 3           | 4,141,870    | 2,582,483   | 10,645,019   | Sediment       | This work |
| <i>H. pylori</i>   |             | 39,665,437   | -           | -            | -              | [108]     |
| <i>S. enterica</i> |             | 348,991,354  | -           | -            | -              | [108]     |
| <i>E. coli</i>     |             | 179,600,000  | -           | -            | -              | [108]     |



|                    |  |           |   |   |   |       |
|--------------------|--|-----------|---|---|---|-------|
| <i>H. sapiens</i>  |  | 20,348    | - | - | - | [108] |
| <i>A. thaliana</i> |  | 266,769   | - | - | - | [59]  |
| <i>C. elegans</i>  |  | 3,998,701 | - | - | - | [109] |
| <i>T. brucei</i>   |  | 5,332,244 | - | - | - | [108] |

1129 Summary table of effective population sizes of CCB Clades and prokaryotic and  
1130 eukaryotic references. First column shows the names of the CCB Clades and  
1131 reference strains used for the calculus, second column represents the number of  
1132 strains within each group, followed by the median Ne value estimated and the  
1133 range. Last two columns display the isolation environment and the reference.

1134

1135

1136

1137

1138

1139

1140

1141

1142

1143

1144

1145 Table 5. GO terms enriched estimated with TopGO [45], regarding the gene  
1146 families with signals of positive selection.

| GO.ID      | Term                                                            | Annotated | Significant | Expected | Fisher test with Bonferroni |
|------------|-----------------------------------------------------------------|-----------|-------------|----------|-----------------------------|
| GO:0000902 | cell morphogenesis                                              | 398       | 67          | 26.93    | 0.00020748                  |
| GO:0009234 | menaquinone biosynthetic process                                | 240       | 38          | 16.24    | 0.00150024                  |
| GO:0009245 | lipid A biosynthetic process                                    | 240       | 38          | 16.24    | 0.00150024                  |
| GO:0008360 | regulation of cell shape                                        | 244       | 37          | 16.51    | 0.0059052                   |
| GO:0007156 | homophilic cell adhesion via plasma membrane adhesion molecules | 13        | 7           | 0.88     | 0.0122892                   |
| GO:0006304 | DNA modification                                                | 295       | 41          | 19.96    | 0.01596                     |
| GO:0009058 | biosynthetic process                                            | 26775     | 1675        | 1811.62  | 0.017556                    |

1147 First two columns show the enriched GO IDs and its name, third column the  
1148 number of annotated genes, fourth and fifth column the number of significant  
1149 genes and the expected, last column shows the significance corrected with  
1150 Bonferroni.

1151

1152

1153

1154

1155

1156 Table 6. GO terms enriched in the genes found to have an association with the  
1157 isolation environment (water or sediment).

| Genes with signals of recombination or selection | GO.ID      | Term                       | Annotated | Significant | Expected | Fisher test with Bonferroni |
|--------------------------------------------------|------------|----------------------------|-----------|-------------|----------|-----------------------------|
| Recombination                                    | GO:0006066 | alcohol metabolic process  | 446       | 8           | 0.55     | 0.000146                    |
| Recombination                                    | GO:0006429 | leucyl-tRNA aminoacylation | 41        | 4           | 0.05     | 0.000338                    |
| Recombination                                    | GO:0006419 | alanyl-tRNA aminoacylation | 48        | 4           | 0.06     | 0.000643                    |
| Recombination                                    | GO:0006265 | DNA topological change     | 339       | 6           | 0.42     | 0.006914                    |
| Selection                                        | GO:0006814 | sodium ion transport       | 685       | 9           | 1.47     | 0.03216                     |

1158 First two columns show the enriched GO IDs and its name, with signals of  
1159 recombination or selection. Third column the number of annotated genes, fourth  
1160 and fifth column the number of significant genes and the expected, last column  
1161 shows the significance corrected with Bonferroni.

1162

1163

1164

1165 **Figures.**

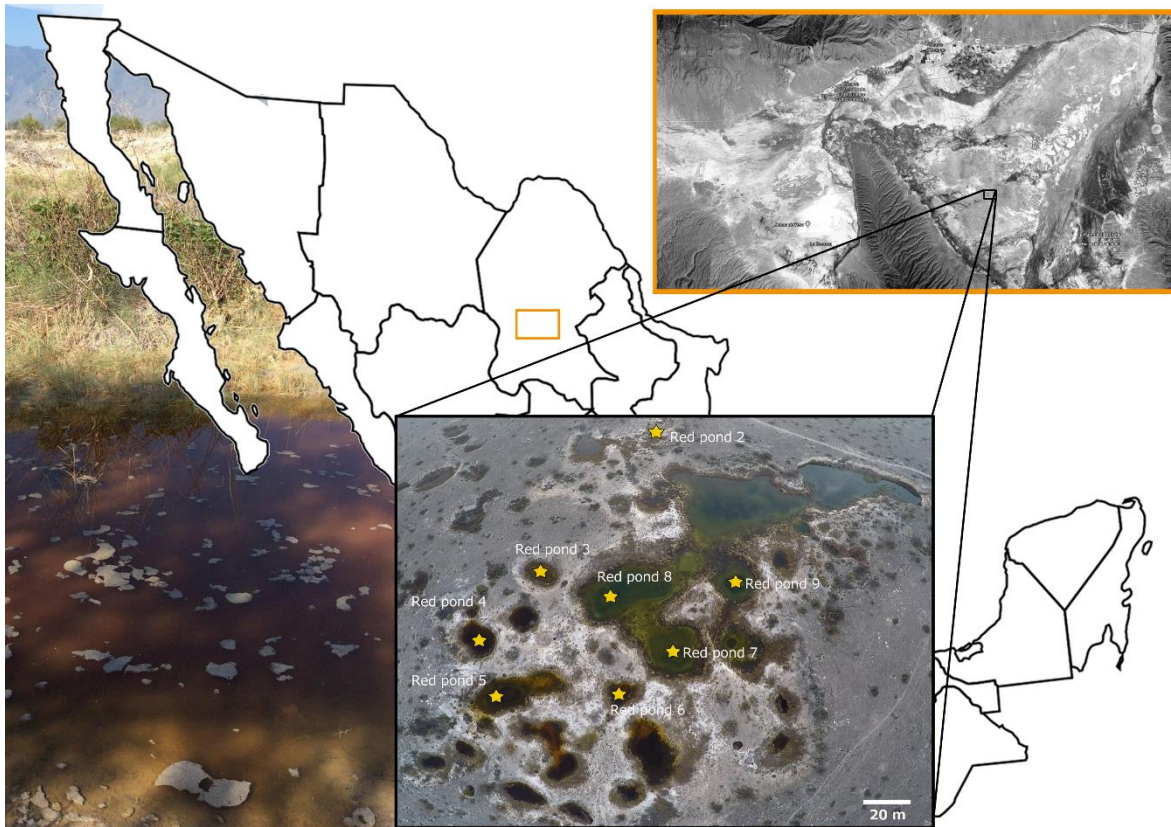

1166

1167 **Figure 1.** Study site, Pozas Rojas in Los Hundidos within Cuatro Ciénegas Basin,  
1168 Mexico. Sampling sites are signaled in yellow. Cuatro Ciénegas location is also  
1169 shown in a map (Pozas Rojas photos were provided by David Jaramillo, a map  
1170 showing the location of Cuatro Ciénegas Valley was obtained from Google Earth,  
1171 [earth.google.com/web/](http://earth.google.com/web/)).

1172

1173

1174

1175

1176

1177

1178

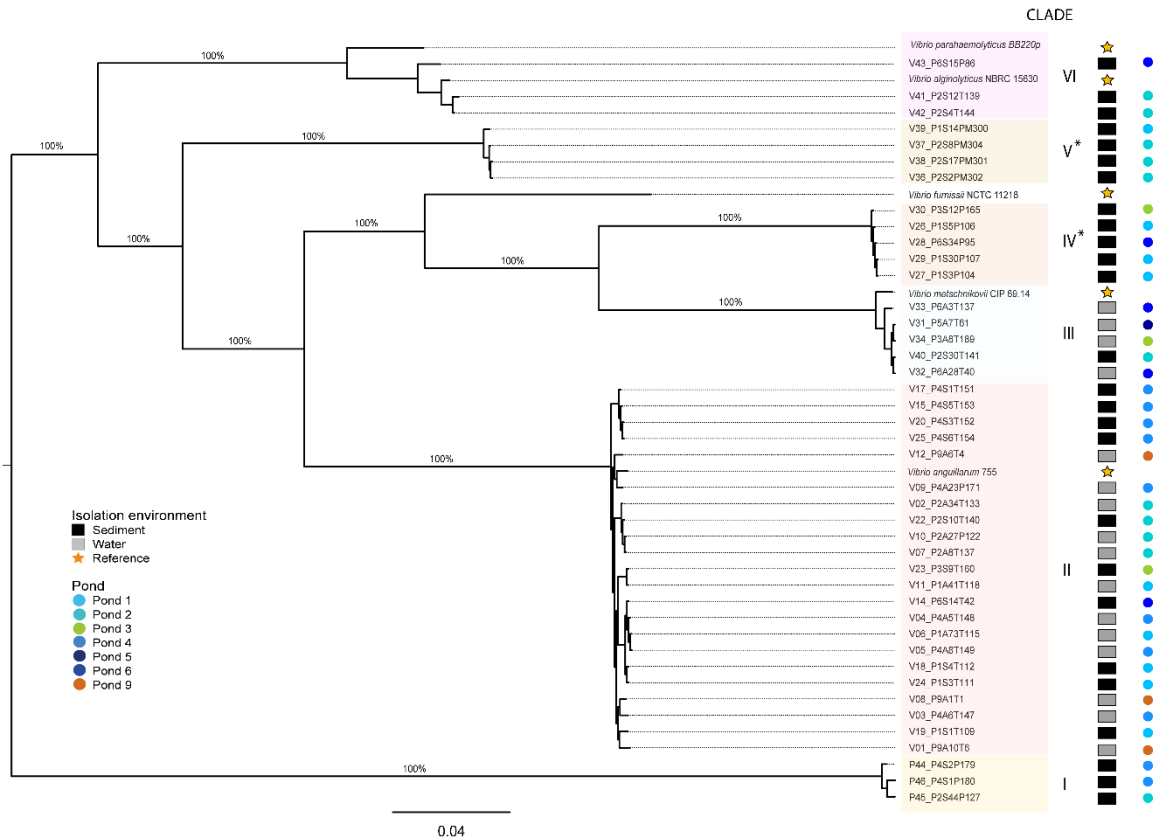

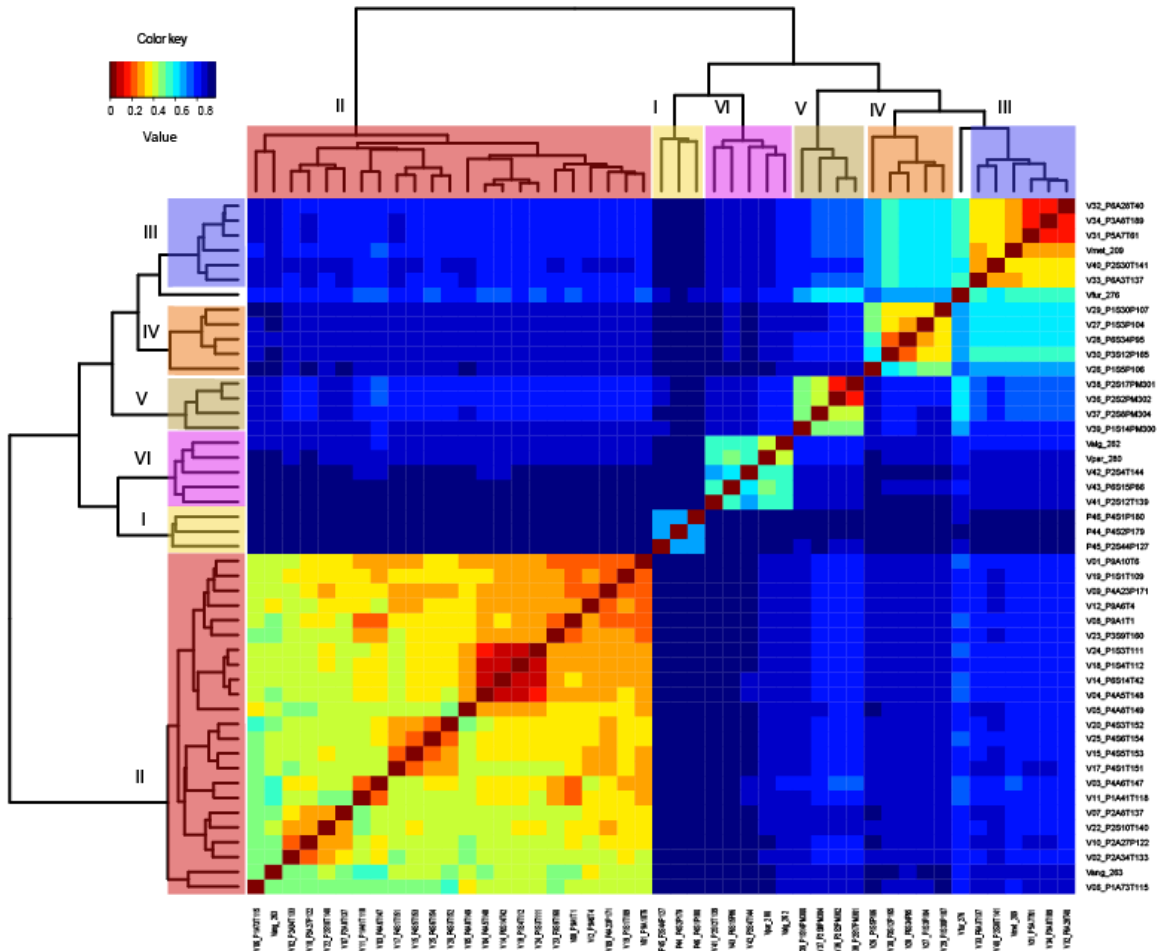

1192

1193 **Figure 3.** Patterns of recombination events among isolated strains. Heatmap of the  
1194 frequency of recombination events among different strains; red colors indicates  
1195 more recombination events within strains while blue events indicate few  
1196 recombination events. Distances were estimated with the Jaccard dissimilarity  
1197 index.

1198

1199

1200

1201

1202

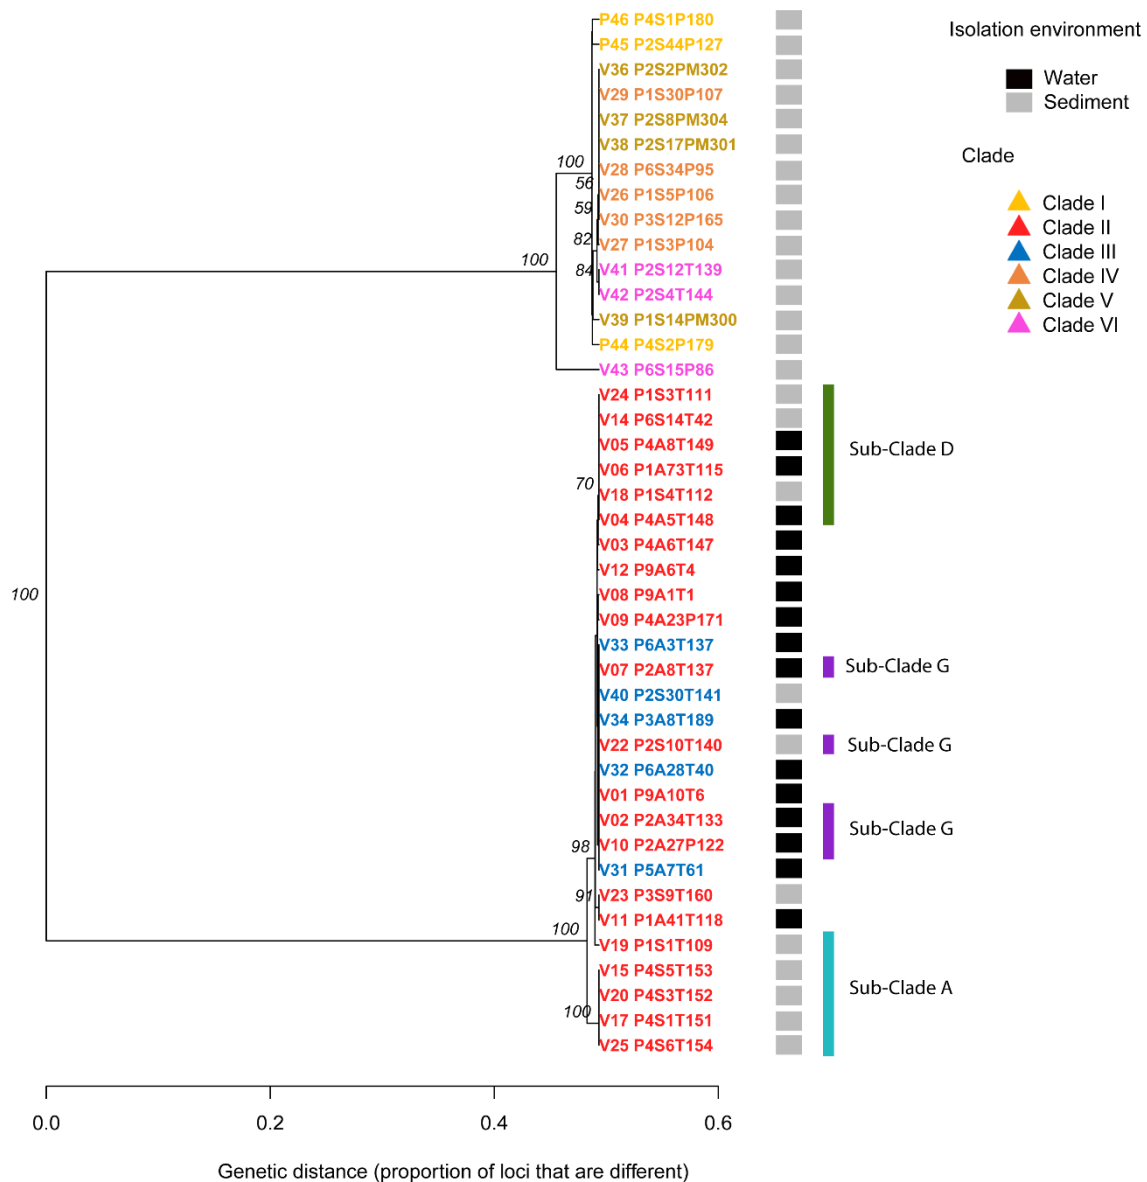

1203

1204 **Figure 4.** UPGMA of the 598 SNPs associated with the isolation environment. Tip  
 1205 colors represent clade membership, for Clade II, Sub-clades are also indicated.  
 1206 Squares represent the isolation environment. Distances were calculated with the  
 1207 bitwise distance function of poppr v2.8.1.
